# Supplementary material
Source: publisher figshare collection journal article supplement (https://acs.figshare.com/ndownloader/files/3834694)
Supplement: Supplementary file 1 [file 3834694]

59
Complex 1, Singlet 
Fe     -0.000000000     0.000002941     0.000004334
N      -0.319673471    -1.398773739     1.401821937
N      -1.910035563     0.000038139     0.000028444
N      -0.319657237     1.398790355    -1.401806268
N       0.319718035     1.401814195     1.398778179
N       1.910035579    -0.000037890    -0.000025954
N       0.319612684    -1.401819408    -1.398780576
C       0.604131249    -2.081391139     2.086360600
C       0.271316108    -3.035966052     3.042335128
C      -1.073212543    -3.290252052     3.295900225
C      -2.041383696    -2.583740486     2.587535481
C      -1.637027797    -1.643427021     1.646113918
C       0.604155438     2.081375163    -2.086366675
C       0.271351344     3.035958622    -3.042336541
C      -1.073174326     3.290288227    -3.295873650
C      -2.041353681     2.583810978    -2.587485886
C      -1.637008694     1.643487373    -1.646069800
C      -2.559708565    -0.832134923     0.833410986
C      -3.952579337    -0.855269936     0.856701636
C      -4.644721001     0.000079100     0.000053449
C      -3.952569368     0.855406300    -0.856608463
C      -2.559698844     0.832228587    -0.833344230
C      -0.604064340     2.086385619     2.081393002
C      -0.271218352     3.042356528     3.035960776
C       1.073318458     3.295882905     3.290242199
C       2.041466624     2.587483859     2.583733501
C       1.637080217     1.646067911     1.643427497
C      -0.604222342    -2.086349937    -2.081365024
C      -0.271449149    -3.042335642    -3.035943414
C       1.073068348    -3.295921090    -3.290268001
C       2.041270722    -2.587564411    -2.583791123
C       1.636956289    -1.646130359    -1.643472392
C       2.559735039     0.833331503     0.832139521
C       3.952606542     0.856581576     0.855271053
C       4.644721011    -0.000092365    -0.000074154
C       3.952542215    -0.856738451    -0.855395245
C       2.559672406    -0.833432772    -0.832214955
H       1.635886267    -1.849638970     1.855030180
H       1.055875878    -3.562726995     3.570642978
H      -1.367305137    -4.027169288     4.033739494
H      -3.094660149    -2.760166040     2.763409732
H       1.635907809     1.849589037    -1.855058263
H       1.055917159     3.562691905    -3.570662981
H      -1.367258421     4.027212771    -4.033709009
H      -3.094628050     2.760270992    -2.763337949
H      -4.486097878    -1.520242838     1.522797922
H      -5.727911948     0.000095665     0.000063661
H      -4.486080199     1.520394166    -1.522696003
H      -1.635826840     1.855085045     1.849644685
H      -1.055761205     3.570691673     3.562719517
H       1.367434822     4.033718481     4.027153630
H       3.094748866     2.763327202     2.760155562
H      -1.635967247    -1.855003827    -1.849582957
H      -1.056031911    -3.570636575    -3.562677046
H       1.367128661    -4.033770060    -4.027188408
H       3.094539285    -2.763454458    -2.760247660
H       4.486146007     1.522666977     1.520238059
H       5.727911948    -0.000114080    -0.000093391
H       4.486032223    -1.522844532    -1.520381270
59
Complex 1, Triplet
Fe     -0.000052270     0.002191153    -0.002024676
N       0.444321128     1.484907929    -1.479805735
N       1.940485033    -0.022476662     0.022366802
N       0.365654010    -1.490077779     1.484124075
N      -0.404709145     1.493905831     1.476023044
N      -1.940674098     0.022126050    -0.021742937
N      -0.405001886    -1.474379541    -1.495264102
C      -0.412513937     2.210815978    -2.201983296
C       0.009646659     3.152141431    -3.135679104
C       1.377474960     3.338054608    -3.317400531
C       2.275179203     2.583693067    -2.566955594
C       1.776411264     1.659519633    -1.650900040
C      -0.528706412    -2.192871615     2.183277252
C      -0.155847974    -3.144263078     3.127766391
C       1.201413929    -3.365375049     3.345485542
C       2.137895094    -2.635122053     2.618963796
C       1.687838879    -1.699136077     1.690094502
C       2.626583842     0.802501422    -0.798725716
C       4.020287328     0.803295643    -0.800556908
C       4.694069982    -0.059778613     0.058073554
C       3.975228021    -0.904143261     0.898801900
C       2.582639612    -0.865467006     0.860743909
C       0.471225742     2.198608754     2.196327254
C       0.073897031     3.142607991     3.138224340
C      -1.288764962     3.353586494     3.330919167
C      -2.206182401     2.621677179     2.582071588
C      -1.731983445     1.694173718     1.656550181
C       0.470661031    -2.195256257    -2.199704209
C       0.072946904    -3.139509521    -3.141192649
C      -1.289818406    -3.334329312    -3.349553359
C      -2.206952254    -2.584968257    -2.617829076
C      -1.732351890    -1.656700478    -1.693298109
C      -2.604773084     0.860493762     0.804022711
C      -3.998013418     0.895001704     0.809257512
C      -4.694397596     0.050971656    -0.050402855
C      -3.998144876    -0.808448120    -0.894770602
C      -2.604914015    -0.803628993    -0.859984365
H      -1.465116664     2.026620356    -2.020960478
H      -0.718429573     3.720211889    -3.700948039
H       1.745118798     4.062069684    -4.035028427
H       3.340888458     2.716942571    -2.696453999
H      -1.570973464    -1.981459680     1.974471619
H      -0.912931630    -3.692989108     3.673726047
H       1.531370619    -4.098055735     4.072568242
H       3.195975084    -2.795463721     2.776407939
H       4.571900073     1.462019798    -1.457035441
H       5.777051978    -0.074356026     0.071923953
H       4.491982419    -1.577494948     1.568875355
H       1.518772831     1.994582740     2.007360136
H       0.816677826     3.693114047     3.701746155
H      -1.637416435     4.079666763     4.055896324
H      -3.268147426     2.773772133     2.720776904
H       1.518318268    -2.004848524    -1.997554954
H       0.815520473    -3.703368718    -3.691635520
H      -1.638760471    -4.061461279    -4.073336057
H      -3.269027162    -2.725749831    -2.767279441
H      -4.532303431     1.565763915     1.467974041
H      -5.777433727     0.063060289    -0.062375224
H      -4.532412071    -1.466459446    -1.566244800
59
Complex 1, Quintet
Fe      0.016202335    -0.183543640     0.084586368
N      -0.708932822    -2.123765247     0.834444416
N      -2.140071457    -0.084209965     0.032926759
N      -0.496119209     1.821125463    -0.718638588
N       0.613480191     0.736607408     1.996695898
N       2.154726877     0.086144832    -0.028131825
N       0.608923203    -0.860764119    -1.927678416
C       0.104855409    -3.112087807     1.219317174
C      -0.371989717    -4.331720879     1.689626567
C      -1.748931404    -4.520440151     1.758342482
C      -2.599105056    -3.492809001     1.357100182
C      -2.046301398    -2.299827553     0.897165166
C       0.406647938     2.738135731    -1.076199082
C       0.052798427     3.994175814    -1.559424880
C      -1.299641708     4.302506879    -1.672020100
C      -2.244901911     3.350553044    -1.301824834
C      -1.810092001     2.112828382    -0.827668275
C      -2.857256405    -1.143259397     0.442067945
C      -4.250365138    -1.116574101     0.420281951
C      -4.883742858     0.035852859    -0.038676797
C      -4.129055639     1.124871621    -0.460453352
C      -2.735972196     1.033386090    -0.410663952
C      -0.245368087     1.071548011     2.963143796
C       0.162856745     1.651202428     4.161127017
C       1.520038385     1.892563089     4.350085948
C       2.418381292     1.550537942     3.342426004
C       1.932651369     0.970801577     2.172027987
C      -0.251743312    -1.299826290    -2.849743025
C       0.153320785    -1.722915110    -4.112592158
C       1.509226702    -1.678399141    -4.421545789
C       2.409607180    -1.215953412    -3.465118629
C       1.927149620    -0.814068093    -2.221038528
C       2.804679427     0.583606333     1.034398527
C       4.193261811     0.718068849     1.016232345
C       4.882314138     0.323168089    -0.127373718
C       4.190698169    -0.189968580    -1.221322920
C       2.801959207    -0.297985924    -1.138114852
H       1.168061594    -2.911453883     1.145835484
H       0.322344227    -5.105629608     1.991432151
H      -2.160986149    -5.455486705     2.119330113
H      -3.671606004    -3.624321184     1.403551585
H       1.446231076     2.451152650    -0.970053262
H       0.821318689     4.704884862    -1.836639319
H      -1.618422000     5.269783447    -2.042525322
H      -3.300017705     3.574526509    -1.382097920
H      -4.832483346    -1.966620863     0.748460650
H      -5.965742812     0.083390974    -0.068010697
H      -4.618555151     2.019462234    -0.819346932
H      -1.291661504     0.868095562     2.764370290
H      -0.568712778     1.905140859     4.917888308
H       1.879181473     2.344263764     5.267367531
H       3.476057605     1.737591602     3.470253669
H      -1.297312307    -1.307887077    -2.562643842
H      -0.579786764    -2.072905264    -4.828474781
H       1.865690931    -1.995570449    -5.394594443
H       3.466286475    -1.167906788    -3.691361984
H       4.729514351     1.118121421     1.865587636
H       5.961043242     0.416474709    -0.166578082
H       4.725214987    -0.495976800    -2.109958617
59
Complex 2, Singlet
Fe     -0.000009368    -0.000017621     0.000017956
N       0.374604656     1.488906297    -1.338197908
N       0.375521678    -1.488668633     1.338132036
N      -0.375390127     1.338053115     1.488833847
N      -0.374749268    -1.338338564    -1.488642153
C      -0.553920344     2.207876218    -1.984428718
C      -0.242700571     3.216150579    -2.890208847
C       1.102013193     3.494335608    -3.139959809
C       2.076577616     2.757422246    -2.477803458
C       1.700691313     1.755622786    -1.577645314
C      -0.552573106    -2.208025795     1.984548408
C      -0.240743592    -3.216074584     2.890370129
C       1.104138003    -3.493568413     3.139987728
C       2.078258140    -2.756255309     2.477623337
C       1.701768575    -1.754740044     1.577405581
C       2.616616874     0.903104571    -0.811398759
C       4.017982238     0.909912044    -0.817199383
C       4.706870864     0.001173378    -0.000335492
C       4.018547409    -0.907943140     0.816591152
C       2.617177432    -0.901884061     0.810917864
C       0.552769045     1.984504412     2.208074369
C       0.241063372     2.890207153     3.216268951
C      -1.103785815     3.139647240     3.494064585
C      -2.077981724     2.477247023     2.756880395
C      -1.701615050     1.577164265     1.755192512
C       0.553734936    -1.984591324    -2.207646180
C       0.242425192    -2.890570687    -3.215713923
C      -1.102313898    -3.140509730    -3.493617780
C      -2.076826308    -2.478351210    -2.756643228
C      -1.700851193    -1.577997100    -1.755060874
C      -2.617121625     0.810624594     0.902467680
C      -4.018501308     0.816126867     0.908759634
C      -4.706880997    -0.000926368    -0.000203566
C      -4.018060323    -0.817765359    -0.909014189
H      -1.579821068     1.948342040    -1.751384622
H      -1.036398500     3.764950028    -3.383334244
H       1.384778044     4.273501099    -3.839907884
H       3.129686235     2.948921497    -2.649816722
H      -1.578626668    -1.948973179     1.751637341
H      -1.034109454    -3.765215516     3.383650120
H       1.387375294    -4.272520830     3.839981794
H       3.131481427    -2.947199343     2.649534856
H       4.583496463     1.601145497    -1.438123018
H       5.792412034     0.001470482    -0.000380748
H       4.584499587    -1.598831553     1.437503457
H       1.578801863     1.751715119     1.948841752
H       1.034494631     3.383510026     3.765291458
H      -1.386931044     3.839534131     4.273146582
H      -3.131178356     2.649021168     2.948086281
H       1.579641942    -1.751388575    -1.948269034
H       1.036067420    -3.383719458    -3.764576169
H      -1.385146944    -3.840613034    -4.272618516
H      -3.129951306    -2.650527481    -2.947895026
H      -4.584450056     1.436974756     1.599707183
H      -5.792422406    -0.001105287    -0.000301456
H      -4.583602684    -1.438823579    -1.600108966
C       1.911388198     0.000415431    -0.000216569
C      -2.616699945    -0.811767633    -0.902461314
C      -1.911406841    -0.000459555     0.000069738
59
Complex 2, Triplet
Fe      0.009462380     0.000985450    -0.009745840
N      -0.467292590    -1.573652370     1.451926568
N      -0.468695810     1.270244189    -1.777614867
N       0.442720650     1.618900329     1.470724149
N       0.493758760    -1.627002979    -1.318271857
C       0.407387710    -2.232051637     2.218612747
C       0.022642270    -2.984494350     3.332008431
C      -1.333126189    -3.062205717     3.659563127
C      -2.260755896    -2.360960967     2.887380580
C      -1.804080961    -1.607229680     1.783409320
C       0.389813330     1.926928842    -2.554735691
C      -0.011913700     2.936215000    -3.439806416
C      -1.379737610     3.246171559    -3.530390881
C      -2.281048117     2.578762659    -2.718521879
C      -1.806922061     1.587195148    -1.832943069
C      -2.655540811    -0.785875918     0.916884108
C      -4.056820860    -0.818259039     0.899951559
C      -4.757069487    -0.016673390    -0.009866140
C      -4.060592867     0.793656908    -0.919247238
C      -2.658153941     0.820894569    -0.886638249
C      -0.430472580     2.377214258     2.138356790
C      -0.024289820     3.419458060     2.983863290
C       1.341766029     3.643550511     3.117698228
C       2.247785467     2.849163740     2.428712879
C       1.779528567     1.836885678     1.590887021
C      -0.385612830    -2.374743736    -2.003971148
C      -0.015097960    -3.345441420    -2.924497926
C       1.352111909    -3.551942427    -3.164059158
C       2.274260890    -2.779972429    -2.466276740
C       1.831409609    -1.817868276    -1.554699867
C       2.647833689     0.927236899     0.792855569
C       4.049398658     0.926121007     0.835633382
C       4.756410418    -0.003708290     0.053338340
C       4.086338227    -0.928067792    -0.750199251
H       1.452702940    -2.160115546     1.890425700
H       0.778842751    -3.515432470     3.910232556
H      -1.678401030    -3.643082750     4.519310998
H      -3.314755518    -2.385794401     3.139890307
H       1.437077480     1.618223400    -2.460222779
H       0.730554071     3.443233066    -4.056347606
H      -1.729781057     4.020990118    -4.215776597
H      -3.346432949     2.820541910    -2.757372016
H      -4.625619048    -1.471250199     1.562749018
H      -5.842470823    -0.047182920    -0.042119970
H      -4.618750629     1.375420710    -1.645650687
H      -1.476031982     2.137095078     1.986888731
H      -0.759499149     4.008536075     3.503803118
H       1.708011570     4.436362248     3.767297368
H       3.321854118     3.023847396     2.522965870
H      -1.432346900    -2.180642521    -1.767830820
H      -0.767922798    -3.922899687    -3.451256377
H       1.681387569    -4.308001839    -3.875449806
H       3.339170527    -2.918483060    -2.635478570
H       4.600427598     1.617957711     1.457724562
H       5.841813373    -0.005854170     0.090545410
H       4.661995948    -1.649368051    -1.328671809
C      -1.929338921     0.053013220     0.050087610
C       2.684247150    -0.921154700    -0.788252342
C       1.947895276     0.013559970    -0.026496760
59
Complex 2, Quintet
Fe     -0.000117618     0.000001212     0.000092395
N       1.785167591     0.626443699     1.398335956
N      -1.783852787     0.630911061    -1.398041257
N       1.783687297    -0.630498456    -1.398226109
N      -1.785335652    -0.626856182     1.398148881
C       2.638278521    -0.191390746     2.016740422
C       3.743345410     0.261887903     2.730731854
C       3.958408288     1.639209499     2.788424463
C       3.075016245     2.495580992     2.141283865
C       1.979883039     1.966933501     1.442327172
C      -2.639014443    -0.184798510    -2.016422000
C      -3.742972134     0.271230395    -2.730376073
C      -3.954610960     1.649083539    -2.788053457
C      -3.069073410     2.503255564    -2.140937275
C      -1.975233031     1.971883604    -1.442021365
C       0.981741691     2.787372728     0.708294523
C       0.990044243     4.191572397     0.708149994
C       0.006068978     4.885675852     0.000027065
C      -0.979689806     4.194040135    -0.708032675
C      -0.975021045     2.789825248    -0.708022716
C       2.638804010     0.185401328    -2.016415364
C       3.742895917    -0.270391932    -2.730314450
C       3.954724230    -1.648209190    -2.788141496
C       3.069234910    -2.502578900    -2.141219395
C       1.975252971    -1.971437656    -1.442350815
C      -2.638491213     0.190787059     2.016747581
C      -3.743422432    -0.262728438     2.730796652
C      -3.958295483    -1.640086330     2.788338366
C      -3.074856026    -2.496258709     2.140999856
C      -1.979865496    -1.967379047     1.441994388
C       0.975093564    -2.789604904    -0.708530028
C       0.979870811    -4.193818987    -0.708827330
C      -0.005839337    -4.885675498    -0.000915294
C      -0.989865778    -4.191793397     0.707351804
H       2.422249059    -1.252104148     1.923210155
H       4.410799137    -0.439360059     3.217720389
H       4.808639277     2.042101202     3.328913633
H       3.237297839     3.565833445     2.172745143
H      -2.425613250    -1.246043978    -1.922897982
H      -4.412186264    -0.428352992    -3.217342276
H      -4.803858875     2.054094342    -3.328504875
H      -3.228713511     3.573906826    -2.172382107
H       1.741076758     4.758153940     1.251518671
H       0.007475658     5.971222812    -0.000039528
H      -1.729237232     4.762499485    -1.251488958
H       2.425253838     1.246606891    -1.922775171
H       4.412067675     0.429340607    -3.217124773
H       4.804083262    -2.053039533    -3.328553507
H       3.229026397    -3.573204513    -2.172766337
H      -2.422612620     1.251541082     1.923333416
H      -4.410917434     0.438369789     3.217943961
H      -4.808413699    -2.043160049     3.328869193
H      -3.236985471    -3.566537208     2.172358167
H       1.729457349    -4.762110005    -1.252406297
H      -0.007168088    -5.971222548    -0.001210828
H      -1.740860906    -4.758544510     1.250594897
C       0.002430412     2.067750744     0.000173009
C      -0.981670908    -2.787592469     0.707784205
C      -0.002416059    -2.067749649    -0.000192077
61
Complex 3, Singlet
Fe      0.000000310     0.054948996     0.000000772
N      -0.708126715     1.429767881    -1.256459070
N       0.103635155    -1.359553971     1.410083928
N      -0.103647938    -1.359536408    -1.410099015
N       0.708140416     1.429746476     1.256476712
C       0.006140015     2.145090697    -2.134707907
C      -0.573287298     3.081728905    -2.982388976
C      -1.949345005     3.284788287    -2.910088823
C      -2.695695534     2.546772076    -1.996738693
C      -2.052670326     1.618808628    -1.181430653
C       1.207796066    -1.994605669     1.823058933
C       1.182674981    -2.977342070     2.805485205
C      -0.039707830    -3.308974786     3.384211080
C      -1.189724479    -2.649274495     2.962091977
C      -1.094812731    -1.679011695     1.967502779
C      -2.740554844     0.775197789    -0.168529099
C      -4.102080641     0.733960411    -0.029988833
C      -3.548239007    -1.170683254     1.789472056
C      -2.251170904    -0.907838008     1.438284004
C      -1.207814883    -1.994572897    -1.823081286
C      -1.182703266    -2.977297731    -2.805519363
C       0.039676290    -3.308934902    -3.384249567
C       1.189699211    -2.649250360    -2.962122923
C       1.094796803    -1.678998545    -1.967522110
C      -0.006119292     2.145065159     2.134734641
C       0.573317118     3.081687418     2.982427109
C       1.949376724     3.284734729     2.910129072
C       2.695719993     2.546722837     1.996769522
C       2.052685762     1.618775607     1.181450137
C       2.251162194    -0.907841501    -1.438294831
C       3.548227740    -1.170693584    -1.789487233
C       4.102087366     0.733923993     0.029995419
C       2.740562072     0.775171044     0.168537821
H       1.069928559     1.942977606    -2.142966421
H       0.044806789     3.636362744    -3.677515178
H      -2.436329046     4.009949640    -3.551733666
H      -3.764416643     2.695617539    -1.914967066
H       2.129895739    -1.695648477     1.340568411
H       2.102351806    -3.463920508     3.105882966
H      -0.099229332    -4.066980195     4.156627275
H      -2.148378613    -2.882509620     3.406515534
H      -4.793192901     1.296483218    -0.642031048
H      -3.847986547    -1.958276749     2.466572625
H      -2.129911641    -1.695612953    -1.340586895
H      -2.102384715    -3.463863997    -3.105922681
H       0.099190490    -4.066931606    -4.156674869
H       2.148350995    -2.882489098    -3.406549666
H      -1.069909726     1.942961900     2.142991049
H      -0.044771525     3.636318441     3.677560396
H       2.436367788     4.009883493     3.551782806
H       3.764442478     2.695559176     1.914999377
H       3.847968062    -1.958281549    -2.466597401
H       4.793205088     1.296433740     0.642043478
N      -1.858288599     0.032153323     0.544007373
N       1.858288821     0.032142526    -0.544006595
S       4.856153003    -0.149839853    -1.265102872
S      -4.856155538    -0.149813475     1.265097226
O      -5.978242877    -0.972368020     0.745212756
O      -5.260491942     0.775149861     2.357159622
O       5.978235469    -0.972408815    -0.745230753
O       5.260493683     0.775133721    -2.357155034
61
Complex 3, Triplet
Fe     -0.145096975     0.040411750     0.073696039
N      -0.850393595     1.408114167    -1.191151792
N      -0.025467082    -1.371139576     1.479418144
N      -0.043040562    -1.477482186    -1.522868139
N       0.841539174     1.527296166     1.352881967
C      -0.134033751     2.121450944    -2.069957440
C      -0.715332685     3.049526398    -2.925731306
C      -2.092846794     3.244719565    -2.862807982
C      -2.841485427     2.507451072    -1.949669735
C      -2.197606328     1.590215982    -1.125145227
C       1.086823224    -1.995814395     1.888457436
C       1.072752492    -2.978142880     2.871379473
C      -0.144421651    -3.322023688     3.454065493
C      -1.303074417    -2.674430696     3.035167576
C      -1.219628087    -1.703368061     2.041811705
C      -2.885748142     0.743837625    -0.111727899
C      -4.239383885     0.715002341     0.042794794
C      -3.672697946    -1.195048917     1.879856724
C      -2.384706968    -0.943783752     1.511202099
C      -1.107494426    -2.107232730    -2.026982440
C      -1.019482128    -2.978217573    -3.106969176
C       0.231939959    -3.181912237    -3.685576907
C       1.339593878    -2.522277813    -3.163346388
C       1.171962630    -1.677792397    -2.062678914
C       0.195021081     2.316105541     2.215952251
C       0.836792550     3.309382835     2.946586053
C       2.205404717     3.487321587     2.752302456
C       2.877686974     2.668586288     1.851099531
C       2.165005472     1.679415728     1.168237746
C       2.288680837    -0.924118336    -1.415415542
C       3.588567247    -1.247947074    -1.705013553
C       4.145235296     0.630929545     0.102105410
C       2.781359434     0.738674978     0.183898802
H       0.930243123     1.922494236    -2.069064914
H      -0.096987022     3.603569050    -3.621013361
H      -2.580283186     3.962304074    -3.512441745
H      -3.912060027     2.648063098    -1.878542455
H       2.003216324    -1.686947655     1.401531774
H       1.997831184    -3.455986829     3.169084468
H      -0.193918832    -4.081016848     4.226118995
H      -2.258479524    -2.920059754     3.480022688
H      -4.933922706     1.292365728    -0.551435582
H      -3.968371948    -1.963948751     2.579993282
H      -2.055495021    -1.896540205    -1.542235702
H      -1.906296116    -3.471956604    -3.485295367
H       0.345108973    -3.840565514    -4.539200483
H       2.311755361    -2.653625168    -3.619310638
H      -0.870789815     2.135788011     2.312279003
H       0.277388228     3.927344400     3.638359155
H       2.743821132     4.259566260     3.289934498
H       3.935320868     2.812662197     1.675486290
H       3.874231085    -2.052252139    -2.367817791
H       4.830760694     1.176598789     0.734518577
N      -2.000245804    -0.010621635     0.596609276
N       1.876283032     0.024441364    -0.534669528
S       4.931741284    -0.331660450    -1.105279158
S      -4.998561120    -0.211266274     1.313033971
O      -6.067067812    -1.070700708     0.748715279
O      -5.462547887     0.692517528     2.394899546
O       5.941184756    -1.228548195    -0.483642057
O       5.499703377     0.530934828    -2.176525771
61
Complex 3, Quintet
Fe     -0.000003590    -0.003723433    -0.000011340
N      -0.966462715     1.474865622    -1.278490749
N      -0.127531304    -1.500150820     1.585406814
N       0.127527425    -1.500116800    -1.585462293
N       0.966449867     1.474855324     1.278485388
C      -0.300939392     2.220990510    -2.166836774
C      -0.924476298     3.188799029    -2.944631336
C      -2.293954247     3.384620091    -2.777221342
C      -2.985648343     2.610277125    -1.851620077
C      -2.292386649     1.648033609    -1.114534324
C       0.933966144    -2.162903998     2.057046453
C       0.841801911    -3.076206634     3.100004617
C      -0.409299946    -3.294322250     3.673422029
C      -1.513096400    -2.603121019     3.184998727
C      -1.344057938    -1.709839300     2.124923764
C      -2.930334926     0.754782222    -0.096894419
C      -4.288690300     0.736106055     0.052553894
C      -3.754374633    -1.154536962     1.877035596
C      -2.457842487    -0.916624647     1.515774269
C      -0.933973462    -2.162837184    -2.057140477
C      -0.841804726    -3.076122447    -3.100113305
C       0.409306273    -3.294256172    -3.673503676
C       1.513106475    -2.603089332    -3.185040278
C       1.344062700    -1.709822541    -2.124953361
C       0.300918293     2.220991965     2.166815263
C       0.924453289     3.188791938     2.944622133
C       2.293938308     3.384590558     2.777243028
C       2.985641072     2.610234653     1.851659041
C       2.292380045     1.648002218     1.114558534
C       2.457850133    -0.916643327    -1.515761543
C       3.754385835    -1.154572343    -1.876999342
C       4.288694279     0.736044115    -0.052485376
C       2.930336386     0.754739364     0.096934056
H       0.763213317     2.024051666    -2.242686215
H      -0.350736142     3.772275052    -3.654108633
H      -2.819538702     4.135012502    -3.356666808
H      -4.045952243     2.765449292    -1.705668479
H       1.880494991    -1.942905151     1.574531429
H       1.725573464    -3.593613909     3.452447158
H      -0.526288977    -3.991097744     4.495540887
H      -2.484803113    -2.755720782     3.634595440
H      -4.972109790     1.327295112    -0.539730092
H      -4.057524057    -1.911737984     2.585665675
H      -1.880509359    -1.942826611    -1.574644514
H      -1.725579475    -3.593502920    -3.452587189
H       0.526299657    -3.991019394    -4.495632318
H       2.484820491    -2.755704399    -3.634615734
H      -0.763239008     2.024068991     2.242640965
H       0.350706519     3.772278418     3.654085487
H       2.819521853     4.134975180     3.356699395
H       4.045951222     2.765388194     1.705732208
H       4.057536043    -1.911760617    -2.585642529
H       4.972108467     1.327228494     0.539809633
N      -2.039959781    -0.008303204     0.592941908
N       2.039963824    -0.008330707    -0.592922355
S       5.081234369    -0.208390559    -1.275820489
S      -5.081211202    -0.208291688     1.275930251
O      -6.110005515    -1.088461626     0.665598548
O      -5.618330937     0.672602869     2.345450561
O       6.109954238    -1.088610240    -0.665434386
O       5.618455452     0.672479624    -2.345309858
59
Complex 4 ,Singlet
Fe      0.000528083     0.007358174    -0.009098595
N       0.280975537    -0.469354421     1.910112495
N       0.374963636     0.492999415    -1.911329200
N      -0.299705441    -1.906617248    -0.500211231
N      -0.354856936     1.916957444     0.462556472
C      -0.668415638    -0.700290717     2.823562041
C      -0.373473062    -1.017151335     4.144853950
C       0.960528014    -1.096309647     4.532589409
C       1.955610093    -0.858530456     3.589571678
C       1.586025825    -0.548294095     2.284556419
C      -0.528165364     0.734833273    -2.868169135
C      -0.167525474     1.068673822    -4.168891909
C       1.183951669     1.154741590    -4.488353565
C       2.131098326     0.905369751    -3.500159786
C       1.696943320     0.576689066    -2.219857378
C       2.581159424    -0.288492286     1.233926757
C       3.923408841    -0.310306545     1.285674774
C       4.741190741    -0.018054033     0.100560651
C       3.982785524     0.290394402    -1.119333776
C       2.639307295     0.299724793    -1.125784261
C       0.639283930    -2.831753006    -0.729315743
C       0.328577103    -4.144767969    -1.064972772
C      -1.009808329    -4.511138126    -1.167803996
C      -1.993602095    -3.555756921    -0.932831979
C      -1.608797087    -2.260704460    -0.600502094
C       0.558260116     2.864213090     0.704867513
C       0.211161634     4.173543440     1.018856587
C      -1.136799948     4.512666003     1.081495050
C      -2.094075665     3.534597670     0.830758480
C      -1.673465574     2.244009301     0.525658828
C      -2.592975295    -1.200727237    -0.335978783
C      -3.935782951    -1.245234882    -0.333219171
C      -4.741504776    -0.053790248    -0.034112389
C      -3.970761660     1.159909212     0.267988906
C      -2.627279345     1.158751202     0.253065797
H      -1.692009150    -0.628332163     2.480165864
H      -1.179185068    -1.194811713     4.845292096
H       1.226915164    -1.339451212     5.553891229
H       3.001112187    -0.912019419     3.862656000
H      -1.567608119     0.657964981    -2.576995937
H      -0.937061571     1.254875644    -4.906766311
H       1.500587561     1.412583407    -5.491558070
H       3.188884221     0.966180478    -3.719136939
H       4.432885268    -0.548335259     2.209443747
H       4.536754309     0.509867400    -2.021796361
H       1.667310307    -2.504883472    -0.639210787
H       1.126010829    -4.855393708    -1.239647380
H      -1.288043509    -5.525241151    -1.427257432
H      -3.042325873    -3.810576554    -1.006669324
H       1.594786502     2.558710357     0.644054341
H       0.988203569     4.903031314     1.206992801
H      -1.443033570     5.523464386     1.321565387
H      -3.149383449     3.769681279     0.870524173
H      -4.454188932    -2.169020487    -0.551616465
H      -4.515307375     2.062922833     0.508110790
O      -1.948621001    -0.008626433    -0.052984087
O       1.949199360     0.015061609     0.039978969
O      -5.966210975    -0.071974201    -0.032520633
O       5.965654016    -0.032125176     0.127328464
59
Complex 4, Triplet
Fe      0.115770401     0.097401114     0.007032252
N       0.131486274    -1.124768485    -1.591863009
N       0.850175939     1.270582053     1.456745150
N      -0.733716021     1.731964966    -0.980217385
N      -0.266237130    -1.437891084     1.394210422
C      -0.943379518    -1.655146745    -2.189924368
C      -0.851042144    -2.491880202    -3.295072703
C       0.408895070    -2.791437482    -3.802398316
C       1.533098547    -2.246523443    -3.190543736
C       1.368960059    -1.415794438    -2.087000179
C       0.109250395     1.923701654     2.361573786
C       0.672503516     2.717250795     3.353839086
C       2.057519336     2.838071286     3.410546282
C       2.836103271     2.163864354     2.475581459
C       2.207272030     1.386623047     1.508513487
C       2.528869784    -0.815428465    -1.401487635
C       3.841856034    -0.917033357    -1.663968696
C       4.841186813    -0.223056844    -0.835183878
C       4.296457457     0.580431191     0.270394400
C       2.973430980     0.650586097     0.488780210
C       0.051217637     2.638544819    -1.580984835
C      -0.457255700     3.718543451    -2.290991791
C      -1.838153475     3.870183758    -2.375704812
C      -2.659892833     2.940450196    -1.749315232
C      -2.078341427     1.878944603    -1.059769849
C       0.749047401    -2.093416633     1.973285998
C       0.556885181    -3.145006439     2.860084693
C      -0.745824564    -3.528631398     3.164661510
C      -1.806037536    -2.848339695     2.576762692
C      -1.534724158    -1.806504852     1.692443890
C      -2.895372531     0.866203864    -0.372344309
C      -4.233030018     0.712807833    -0.376992844
C      -4.873188487    -0.373893341     0.372001789
C      -3.942658667    -1.255183319     1.085319546
C      -2.613816193    -1.041101806     1.047241214
H      -1.903869844    -1.398132916    -1.764594732
H      -1.752268766    -2.893859757    -3.739243313
H       0.520187843    -3.440405667    -4.662362012
H       2.524135564    -2.464498970    -3.564847080
H      -0.962259540     1.797398226     2.278476634
H       0.030560681     3.224113310     4.062554866
H       2.529443454     3.447779222     4.171218521
H       3.915160254     2.239023896     2.495795558
H       4.198092341    -1.512119084    -2.493668905
H       4.991281869     1.117538469     0.901555267
H       1.119531218     2.486106148    -1.489512877
H       0.220636425     4.420393035    -2.759154624
H      -2.272305427     4.702357495    -2.916382703
H      -3.736087893     3.041143654    -1.789137177
H       1.746212115    -1.760773326     1.713141286
H       1.412703816    -3.641945304     3.298282602
H      -0.937281381    -4.341443939     3.854637971
H      -2.828085104    -3.117278316     2.806927128
H      -4.865037634     1.385158041    -0.940446300
H      -4.353627307    -2.086806500     1.640882075
O      -2.100490097     0.007383348     0.335010398
O       2.110599080    -0.047520127    -0.333039568
O      -6.088920026    -0.537175092     0.393366694
O       6.042822711    -0.306347672    -1.054013571
59
Complex 4, Quintet
Fe     -0.000095811     0.363243423     0.000105886
N      -1.290791425     1.833484592     0.897490361
N      -0.025679396    -1.099837475    -1.601095908
N       1.289917928     1.833850592    -0.897626661
N       0.026347003    -1.098974355     1.601998965
C      -0.751354122     2.853578078     1.580354770
C      -1.521682914     3.789177046     2.259392059
C      -2.907757432     3.663938121     2.221597217
C      -3.475298977     2.612850847     1.510072814
C      -2.636148392     1.711627115     0.857915251
C       1.119882718    -1.506039944    -2.166015470
C       1.177444768    -2.534815646    -3.097046749
C      -0.007495775    -3.166951127    -3.461943978
C      -1.203653661    -2.741484989    -2.895669749
C      -1.179653692    -1.700937703    -1.968651273
C      -3.166359153     0.581360431     0.079603026
C      -4.448345307     0.199095640    -0.064479371
C      -4.810515628    -0.957834862    -0.887939427
C      -3.676064984    -1.613245155    -1.543968566
C      -2.414964480    -1.181354901    -1.360541167
C       0.750009668     2.853696720    -1.580491764
C       1.519912118     3.789501924    -2.259732806
C       2.906035770     3.664743560    -2.222160595
C       3.474059612     2.613890839    -1.510668074
C       2.635330909     1.712429125    -0.858309604
C      -1.118984863    -1.505183274     2.167374101
C      -1.176132763    -2.533860682     3.098542384
C       0.008985159    -3.165874379     3.463076539
C       1.204915177    -2.740389672     2.896327426
C       1.180499618    -1.699953624     1.969202697
C       3.166076704     0.582364693    -0.080063410
C       4.448177839     0.200293607     0.063516516
C       4.810847528    -0.956516380     0.886945812
C       3.676761275    -1.612025047     1.543520676
C       2.415528218    -1.180326461     1.360561345
H       0.330022696     2.911567227     1.572243161
H      -1.040218408     4.595388429     2.797591966
H      -3.542157104     4.376890435     2.734180640
H      -4.549497573     2.500332024     1.458973430
H       2.019307952    -0.987564296    -1.862823092
H       2.130261427    -2.824855012    -3.520659243
H      -0.005288694    -3.975226455    -4.183224261
H      -2.138022435    -3.207759707    -3.176157710
H      -5.243670727     0.742361015     0.426793309
H      -3.882229249    -2.455053194    -2.190129170
H      -0.331381044     2.911320350    -1.572206034
H       1.038084961     4.595510521    -2.797914103
H       3.540102611     4.377882647    -2.734892939
H       4.548304638     2.501734635    -1.459735620
H      -2.018545334    -0.986805112     1.864402379
H      -2.128773634    -2.823934651     3.522529318
H       0.007091296    -3.974080495     4.184438839
H       2.139426003    -3.206566063     3.176516233
H       5.243219884     0.743605486    -0.428163884
H       3.883299177    -2.453741252     2.189684984
O       2.153791000    -0.116055434     0.532677149
O      -2.153696733    -0.116953777    -0.532662570
O       5.968322128    -1.337473306     1.023216553
O      -5.967883122    -1.338957780    -1.024667657
55
Complex 5, Singlet
Fe     -0.000002229     0.000064685    -0.000065310
C       3.971208936     0.517163112    -0.460730727
C       1.862118186     1.709273213    -1.513715791
C       3.975396665    -0.502234574     0.440371359
C       1.876108779    -1.702481213     1.503661609
H       4.794251822     1.036937022    -0.920972520
C       2.401806790     2.663135202    -2.357910927
N       0.522634883     1.521071095    -1.345409091
H       4.802703253    -1.018533123     0.896863577
C       2.423581982    -2.654650364     2.344746046
N       0.535111200    -1.518930049     1.342487308
C       1.518837052     3.471444112    -3.070932748
H       3.474552313     2.769482041    -2.453256632
C      -0.306432067     2.310511101    -2.042257347
C       1.547233198    -3.466017547     3.062448323
H       3.497193578    -2.757485816     2.434042678
C      -0.287496590    -2.311199640     2.043751134
C       0.146478733     3.295215216    -2.913109641
H       1.904453992     4.229911418    -3.741708692
H      -1.362938022     2.134827607    -1.885596964
C       0.173450840    -3.294357187     2.912131664
H       1.939057954    -4.223247574     3.731020137
H      -1.345398608    -2.139131273     1.892635465
H      -0.566712309     3.905891969    -3.451572285
H      -0.534783317    -3.907451174     3.454375659
C      -3.973822648    -0.456815241    -0.500091937
C      -1.870863273    -1.512079401    -1.700990372
C      -3.972799706     0.444286876     0.519315552
C      -1.867366941     1.505340535     1.710750480
H      -4.799508964    -0.916240538    -1.016362665
C      -2.415422043    -2.356141025    -2.652197385
N      -0.530424050    -1.344904891    -1.518628455
H      -4.797464615     0.901608778     1.039120995
C      -2.409959125     2.346598203     2.665557252
N      -0.527326913     1.343021094     1.521360423
C      -1.536561779    -3.070265466    -3.464003637
H      -3.488700247    -2.450591965    -2.753892078
C       0.294626614    -2.042809718    -2.311341666
C      -1.529490860     3.063214762     3.473418186
H      -3.483036125     2.436793124     2.773034598
C       0.299308055     2.043262741     2.310326910
C      -0.163317112    -2.913644227    -3.293727281
H      -1.926025869    -3.741015004    -4.220524793
H       1.352019472    -1.887003966    -2.140266675
C      -0.156596539     2.911690663     3.295794813
H      -1.917454971     3.731841749     4.232586562
H       1.356319429     1.891315443     2.133605985
H       0.546727704    -3.453021193    -3.907257987
H       0.554787983     3.453064263     3.906001588
C       1.840361605     0.003408433    -0.004872041
C      -1.840367039    -0.003169669     0.004685340
N      -2.625846058    -0.721816456    -0.805055575
N      -2.624186781     0.713107141     0.818124199
N       2.621681153     0.816407067    -0.724369598
N       2.628339896    -0.806770284     0.710542097
55
Complex 5, Triplet
Fe     -0.000000382    -0.000098665     0.000039733
C       4.020395593     0.515347201    -0.449740033
C       1.989397020     1.745370380    -1.527851559
C       4.022150207    -0.506362074     0.444547557
C       1.995349481    -1.740993534     1.525312128
H       4.841603847     1.039377863    -0.908059130
C       2.625488461     2.672552218    -2.336967749
N       0.645875367     1.630254355    -1.430719167
H       4.845161061    -1.028468859     0.901832810
C       2.634605089    -2.666774761     2.333530294
N       0.651438072    -1.628821910     1.430077127
C       1.822315783     3.528792686    -3.087330246
H       3.705676005     2.724774928    -2.379297439
C      -0.109086137     2.461082797    -2.159502616
C       1.834374367    -3.524757191     3.085041258
H       3.714959482    -2.716649073     2.374329512
C      -0.100672183    -2.461292553     2.159939193
C       0.435469364     3.425675686    -3.001056623
H       2.280895376     4.268771414    -3.732563996
H      -1.180615762     2.338648961    -2.056197414
C       0.447185543    -3.424678070     3.000729623
H       2.295483548    -4.263720872     3.729634974
H      -1.172612089    -2.341197621     2.058149813
H      -0.214971304     4.076477301    -3.571288214
H      -0.201005604    -4.076902505     3.571895673
C      -4.021099044    -0.451318287    -0.508576076
C      -1.991776619    -1.528770793    -1.741950482
C      -4.021448909     0.442966662     0.513136968
C      -1.992970046     1.524398466     1.744412775
H      -4.843030969    -0.909891497    -1.031249134
C      -2.629125724    -2.338192001    -2.667998563
N      -0.648094196    -1.431101333    -1.629140485
H      -4.843736553     0.899996745     1.036603857
C      -2.630967075     2.332312403     2.671330083
N      -0.649219127     1.429699601     1.629934356
C      -1.827117786    -3.088265085    -3.525583978
H      -3.709381891    -2.380983312    -2.718366592
C       0.105739349    -2.159621935    -2.461224813
C      -1.829570655     3.084113367     3.527968567
H      -3.711252723     2.372649560     2.723061124
C       0.104020072     2.159824329     2.461151135
C      -0.440131444    -3.001426465    -3.424853911
H      -2.286705080    -3.733721132    -4.264742952
H       1.177434486    -2.055888216    -2.340616844
C      -0.442521764     3.000365729     3.425502275
H      -2.289671748     3.728485384     4.267753753
H       1.175794624     2.058462208     2.339230633
H       0.209415592    -3.571424207    -4.076751547
H       0.206563129     3.571765627     4.076632609
C       1.877682272     0.002008452    -0.001245533
C      -1.877682827    -0.002134064     0.001225651
N      -2.675851188    -0.713473845    -0.810443938
N      -2.676404252     0.707670231     0.813690874
N       2.674737540     0.815001143    -0.712319741
N       2.677516651    -0.809133796     0.708821467
55
Complex 5, Quintet
Fe     -0.776522716     0.126907157     0.468727098
C       1.169164690     3.817543696     0.055173891
C      -1.205520710     3.030011173    -0.377595781
C       2.257038464     3.175087184     0.534527661
C       2.675873588     0.810726265     1.335630288
H       1.057949146     4.822362805    -0.313039336
C      -1.706296395     4.234299974    -0.851074842
N      -1.920699844     1.894895729    -0.350087524
H       3.268181092     3.521924903     0.651157698
C       3.991730709     1.043619922     1.725361962
N       2.095608289    -0.385111103     1.346689070
C      -3.015152364     4.247892288    -1.326842766
H      -1.102226668     5.131335190    -0.850799585
C      -3.178021795     1.920251890    -0.810987049
C       4.743177061    -0.054658688     2.133504643
H       4.422267264     2.035757717     1.717631588
C       2.827471110    -1.428538602     1.743578258
C      -3.766714045     3.075012287    -1.311627672
H      -3.439179870     5.170250167    -1.705678570
H      -3.713650298     0.979856719    -0.773219872
C       4.157741367    -1.317945154     2.141260142
H       5.773528928     0.081583266     2.440748036
H       2.326840218    -2.391357874     1.732269100
H      -4.785082382     3.051044083    -1.677415274
H       4.713079626    -2.196327100     2.446071225
C      -0.005080561    -3.586028535    -1.597125851
C       1.649732193    -1.668378112    -1.542987938
C      -1.243546611    -3.757600979    -1.079664901
C      -2.719606703    -2.221152740     0.308185398
H       0.602560630    -4.240819781    -2.197871557
C       2.819130568    -2.419105440    -1.582964423
N       1.587461647    -0.352336919    -1.709522138
H      -1.915651916    -4.595821973    -1.135909681
C      -3.793039219    -3.088124986     0.459890211
N      -2.690807879    -0.985392278     0.830099135
C       4.010036409    -1.732226073    -1.798679178
H       2.804070338    -3.488250256    -1.412942977
C       2.740715883     0.293844401    -1.905538414
C      -4.886142063    -2.641833153     1.196722504
H      -3.779616809    -4.077182382     0.022519123
C      -3.748631758    -0.568603556     1.541855165
C       3.975589825    -0.348334757    -1.956447987
H       4.950386462    -2.270342037    -1.823551867
H       2.669453091     1.370518719    -2.023729630
C      -4.868757882    -1.362471897     1.749644142
H      -5.741688759    -3.291787820     1.336291659
H      -3.681136317     0.434276668     1.946331425
H       4.881937644     0.223115623    -2.114343358
H      -5.701353178    -0.985044037     2.329103033
C       0.540167060     1.706630592     0.600742742
C      -0.536676978    -1.679295557    -0.511171049
N       0.404122111    -2.299461563    -1.242009981
N      -1.553617060    -2.570882692    -0.415540023
N       0.123803817     2.896134213     0.101435061
N       1.850219102     1.878096406     0.864544889
55
Complex 6, Singlet
Fe     -0.010490796     0.037326702     0.000215448
C      -0.768770725    -0.809872501     2.611866948
C       0.799317294     0.755768063     2.635805570
C      -0.435808847    -0.592898151     3.976208719
C      -1.613981706    -1.636225543     1.769429168
C       0.561099072     0.402417823     3.991511243
C       1.639180416     1.612375759     1.818752362
H      -0.857718354    -1.089747706     4.840204888
C      -2.536111563    -2.595372902     2.202096206
N      -1.431432048    -1.398239588     0.423153354
H       1.045204956     0.810305474     4.869354995
C       2.592538264     2.525932829     2.281339159
N       1.421437261     1.451102168     0.465935888
C      -3.272222969    -3.309550917     1.264417202
H      -2.664563325    -2.768055855     3.264690745
C      -2.148546574    -2.093566416    -0.463811591
C       3.322426492     3.276171631     1.367394028
H       2.748341665     2.636618143     3.348528375
C       2.132244111     2.182121201    -0.397411035
C      -3.081074176    -3.059045693    -0.096379478
H      -3.989867820    -4.055177479     1.590070342
H      -1.952391431    -1.854214252    -1.503833026
C       3.092945282     3.107209296     0.000023391
H       4.063713145     3.987371855     1.716252197
H       1.910018730     2.004052678    -1.444315206
H      -3.636986327    -3.595747912    -0.855613838
H       3.641990274     3.674340379    -0.741883474
C      -0.819960836     0.760573516    -2.634158162
C       0.746467017    -0.806760336    -2.612824341
C      -0.582581322     0.408761129    -3.990408824
C      -1.658885679     1.616742789    -1.815684785
C       0.413246592    -0.587658476    -3.976761736
C       1.590944410    -1.635264420    -1.771766903
H      -1.066571501     0.818305278    -4.867545008
C      -2.611496212     2.531849512    -2.276744848
N      -1.441083510     1.453229762    -0.463148528
H       0.834330362    -1.083820101    -4.841554724
C       2.511937203    -2.594783473    -2.206027998
N       1.408930004    -1.399043757    -0.425107563
C      -3.340572312     3.281358446    -1.361554097
H      -2.767371312     2.644285069    -3.343741194
C      -2.151095319     2.183584778     0.401413757
C       3.247479235    -3.311117065    -1.269547628
H       2.639971237    -2.766057428    -3.268901106
C       2.125489709    -2.096429985     0.460688227
C      -3.111028288     3.110132540     0.005524385
H      -4.081279822     3.993741355    -1.709227068
H      -1.928880849     2.003720905     1.448013826
C       3.056900847    -3.062374847     0.091652478
H       3.964250081    -4.057043935    -1.596435513
H       1.929811862    -1.858386026     1.501098841
H      -3.659456879     3.676632643     0.748368986
H       3.612401362    -3.600773328     0.849986382
N      -0.014248027     0.014192773     1.867133590
N      -0.006892327     0.017152419    -1.866743046
55
Complex 6, Triplet
Fe      0.063636357    -0.001217511     0.008050839
C       2.637338544    -0.063247812     1.323251007
C       0.945257515    -0.037100013     2.748052396
C       3.203963803    -0.083221961     2.619370453
C       3.075352690    -0.063321666    -0.058979280
C       2.125920052    -0.066570862     3.526077864
C      -0.491203138    -0.009010425     2.955118242
H       4.256222368    -0.106588279     2.870591697
C       4.407525964    -0.087682641    -0.491146538
N       2.042079686    -0.036207798    -0.959439459
H       2.193799671    -0.074704380     4.606096452
C      -1.140007539    -0.003754157     4.195765073
N      -1.213695937     0.013308708     1.790624884
C       4.679696402    -0.084094767    -1.852749066
H       5.207082822    -0.108896000     0.240741693
C       2.323033116    -0.033045039    -2.265390113
C      -2.528839335     0.024365102     4.235026630
H      -0.554120304    -0.021631486     5.107638042
C      -2.546559617     0.040250870     1.843535080
C       3.621280045    -0.056213142    -2.765300424
H       5.706331572    -0.102733002    -2.203064283
H       1.463827181    -0.010834002    -2.928512201
C      -3.255230252     0.046977826     3.041568716
H      -3.044161949     0.028725689     5.189762757
H      -3.049662735     0.056810356     0.881621972
H       3.794993963    -0.052484588    -3.834648593
H      -4.338197220     0.069136642     3.037166131
C      -1.888515355    -1.051398795    -1.893982708
C      -1.842144810     1.152653636    -1.880638256
C      -2.883377725    -0.625266703    -2.805370241
C      -1.366439355    -2.316766489    -1.418201290
C      -2.853792448     0.779857067    -2.796878566
C      -1.267603108     2.389168853    -1.389837910
H      -3.533553249    -1.254837411    -3.398904606
C      -1.841698264    -3.579297094    -1.801868381
N      -0.334678576    -2.194813251    -0.532076904
H      -3.476766772     1.443438941    -3.382500419
C      -1.689386770     3.674915934    -1.758555084
N      -0.242247892     2.213574472    -0.505282081
C      -1.249688792    -4.716481341    -1.269170583
H      -2.663328029    -3.652560858    -2.505532561
C       0.221895821    -3.297754076    -0.027303188
C      -1.050553508     4.779925767    -1.212461625
H      -2.506902802     3.790618816    -2.461295574
C       0.359738621     3.286228501     0.012528105
C      -0.194693642    -4.583170844    -0.361334690
H      -1.605552289    -5.700573171    -1.556090550
H       1.036657183    -3.134632603     0.672407434
C      -0.002527543     4.591824130    -0.306231057
H      -1.364714984     5.781390808    -1.487728396
H       1.166678780     3.080801602     0.710154946
H       0.291618587    -5.447949528     0.074059867
H       0.519372647     5.430248974     0.139372736
N       1.293949211    -0.035997743     1.443531410
N      -1.289209043     0.035319844    -1.358790093
55
Complex 6, Quintet
Fe      0.000874715     0.050026594    -0.046884784
C       2.790498827     0.191894405     1.080763420
C       2.811857096    -0.333280719    -1.057788816
C       4.142653525     0.014289650     0.730415755
C       2.066695528     0.528140015     2.296589168
C       4.156341027    -0.322336264    -0.639666949
C       2.113225048    -0.601876071    -2.304503479
H       5.002989291     0.113628989     1.379600389
C       2.671596174     0.794637510     3.532185982
N       0.713899033     0.568293495     2.153430641
H       5.029144387    -0.530900823    -1.244772466
C       2.744348415    -0.941509168    -3.508697912
N       0.757911448    -0.501520669    -2.225116436
C       1.871578154     1.104482021     4.624908723
H       3.751381543     0.756850310     3.621346970
C      -0.042441192     0.867350359     3.210920959
C       1.969034202    -1.178827662    -4.636617001
H       3.825303704    -1.015224394    -3.546515169
C       0.025635845    -0.732294387    -3.316562791
C       0.483740028     1.144103593     4.470375304
H       2.323415034     1.313704497     5.588870371
H      -1.114358786     0.884007291     3.034951619
C       0.578827752    -1.074279470    -4.547963557
H       2.441547030    -1.442947695    -5.576889747
H      -1.049559920    -0.638196963    -3.193267046
H      -0.172918401     1.381893187     5.298664616
H      -0.059623573    -1.251876993    -5.405049820
C      -2.818861746     1.093523708    -0.223904633
C      -2.784728636    -1.049899599     0.280452644
C      -4.163056376     0.698848127    -0.082915817
C      -2.127203984     2.334605407    -0.533121140
C      -4.141139560    -0.674345212     0.240232791
C      -2.053037496    -2.277418994     0.551214560
H      -5.040987342     1.321345752    -0.197707620
C      -2.767395590     3.552988203    -0.796731390
N      -0.769424370     2.235925563    -0.549190098
H      -4.999162180    -1.308810560     0.421112992
C      -2.650731823    -3.506135022     0.862177080
N      -0.699820676    -2.152116234     0.482317402
C      -1.998935910     4.675411093    -1.078043158
H      -3.850059413     3.605809671    -0.778120080
C      -0.043863700     3.322629622    -0.820625112
C      -1.842579963    -4.610305935     1.102858558
H      -3.731102255    -3.581616954     0.911543519
C       0.064487596    -3.220226244     0.715589188
C      -0.606263045     4.567252431    -1.092312967
H      -2.478579904     5.626457987    -1.284392662
H       1.033646757     3.184717739    -0.818794153
C      -0.454164753    -4.473964030     1.030213799
H      -2.288641281    -5.569239273     1.345033158
H       1.136388798    -3.057346399     0.646313489
H       0.027202388     5.419517313    -1.307026090
H       0.208504841    -5.311707829     1.211550070
N       2.017088678    -0.020933789    -0.008626050
N      -2.016360181     0.027340140    -0.001911787
55
Complex 7, Singlet
Fe     -0.164472122     0.004077229     0.000130517
C      -0.713556603    -0.899471024     2.670152129
C       0.881640408     0.698541485     2.579279448
C      -0.135134513    -0.825186625     3.908548862
C      -1.622731498    -1.689035555     1.851506553
C       0.879345192     0.191317412     3.850625813
C       1.622326942     1.558854263     1.666983624
H      -0.371649663    -1.438484070     4.764134569
C      -2.482604657    -2.655101197     2.363054016
N      -1.550644957    -1.419951506     0.509359131
H       1.539631097     0.475376840     4.655366808
C       2.610162685     2.451858387     2.069409043
N       1.281697208     1.407242278     0.348539737
C      -3.292946755    -3.364714583     1.481653801
H      -2.512970189    -2.838845901     3.429724733
C      -2.339063058    -2.108067618    -0.322632070
C       3.265075420     3.208310755     1.101884105
H       2.852979357     2.551143747     3.119882698
C       1.915688922     2.145867503    -0.567295139
C      -3.223614592    -3.087638312     0.118941329
H      -3.971165221    -4.121861713     1.856746751
H      -2.246997559    -1.863776717    -1.373786044
C       2.913615281     3.057140475    -0.236996128
H       4.037655035     3.909870948     1.393150083
H       1.610854904     1.995024058    -1.596456876
H      -3.838707911    -3.616867845    -0.597477576
H       3.398076306     3.629623154    -1.017415574
C      -0.703498680     0.910453139    -2.671153888
C       0.880481261    -0.698577178    -2.577311565
C      -0.124288459     0.831090390    -3.908877677
C      -1.608433733     1.706616441    -1.854169865
C       0.882968622    -0.192430720    -3.849072148
C       1.614186064    -1.563349126    -1.663579957
H      -0.355540244     1.445167800    -4.765325852
C      -2.460636003     2.678658393    -2.367308992
N      -1.540358964     1.437394129    -0.511840450
H       1.541943585    -0.481878759    -4.652957448
C       2.596476750    -2.463292356    -2.064169188
N       1.272883158    -1.408639957    -0.345690389
C      -3.267339531     3.394198463    -1.487364661
H      -2.488042662     2.862465461    -3.434049846
C      -2.325341715     2.131183947     0.318686816
C       3.244869143    -3.223681528    -1.095347735
H       2.840102845    -2.564709184    -3.114260074
C       1.900659019    -2.150974163     0.571427240
C      -3.202227757     3.116890101    -0.124494562
H      -3.939529870     4.156088292    -1.863704024
H      -2.236781952     1.886399858     1.370028770
C       2.892695651    -3.069306592     0.242986799
H       4.012998219    -3.930703120    -1.385173192
H       1.595555782    -1.997258583     1.600073543
H      -3.814734633     3.650563590     0.590844747
H       3.372168261    -3.644640414     1.024385833
O      -0.117769270     0.058985773     1.896227440
O      -0.115172011    -0.051478340    -1.895823562
55
Complex 7, Triplet
Fe      0.163561246     0.163225798     0.124302625
C       2.013473398     1.703557400    -1.534343214
C       1.713369880    -0.411748869    -2.278084534
C       2.627094006     1.605864514    -2.753178853
C       1.611723866     2.639815310    -0.491477067
C       2.435567603     0.259101893    -3.226608645
C       1.018388043    -1.664315841    -2.002450764
H       3.132966197     2.397603118    -3.283836609
C       2.054025666     3.956210885    -0.427086507
N       0.732578089     2.126725385     0.429350405
H       2.776460063    -0.132737563    -4.172358597
C       1.120723787    -2.792059492    -2.809283501
N       0.225191928    -1.649724970    -0.882803783
C       1.588217285     4.771679090     0.600601071
H       2.750710109     4.327862801    -1.167738129
C       0.301267447     2.921940080     1.414608997
C       0.396656487    -3.931186057    -2.468029809
H       1.757590637    -2.773880308    -3.684592479
C      -0.461330327    -2.753035700    -0.568224999
C       0.700246198     4.249490773     1.536602684
H       1.919420923     5.801026510     0.668543773
H      -0.385212018     2.470385267     2.119447870
C      -0.406224919    -3.915048322    -1.331239593
H       0.462459266    -4.820128465    -3.083863865
H      -1.073472792    -2.695863839     0.323614905
H       0.318381630     4.851417571     2.351067020
H      -0.982984146    -4.780871433    -1.032906470
C      -2.961253300    -0.184724876     0.135824144
C      -2.035078031    -0.820138253     2.061049403
C      -3.945355783    -0.789115128     0.873214065
C      -2.752957673     0.418981053    -1.167444340
C      -3.350838683    -1.197207590     2.109327811
C      -0.812951540    -0.893791703     2.837482492
H      -4.971543586    -0.939747749     0.575080220
C      -3.784046641     0.600488573    -2.089546680
N      -1.472668044     0.788731951    -1.424363743
H      -3.842299384    -1.714021663     2.919140875
C      -0.759908293    -1.380297882     4.142599903
N       0.293856529    -0.436439334     2.189320926
C      -3.485716449     1.182286301    -3.316100284
H      -4.792627824     0.291016316    -1.844882905
C      -1.205355511     1.351554188    -2.606265681
C       0.463792700    -1.392553139     4.801045155
H      -1.663470428    -1.731640115     4.625259308
C       1.464899337    -0.445490775     2.842007645
C      -2.173720063     1.568691096    -3.582034512
H      -4.266589404     1.333350042    -4.052265433
H      -0.177503366     1.643509588    -2.784361858
C       1.596538300    -0.914384915     4.143783937
H       0.531328446    -1.764216492     5.816727251
H       2.318248963    -0.063347236     2.294735471
H      -1.898035015     2.027471924    -4.523168144
H       2.566191086    -0.900869935     4.624744371
O       1.500016028     0.467739740    -1.253559110
O      -1.817090254    -0.198124512     0.869676209
55
Complex 7, Quintet
Fe     -0.001284622     0.533151340    -0.002309267
C       1.513181650    -1.091714219     2.227359279
C       2.873538526     0.397042264     1.266213298
C       2.760156552    -1.290620268     2.752148053
C       0.170270586    -1.632822039     2.315313151
C       3.632621461    -0.336286273     2.135373998
C       3.008187662     1.446844181     0.274123043
H       3.036191995    -2.031308633     3.486658528
C      -0.165627157    -2.679635339     3.173381435
N      -0.736402617    -1.044600604     1.494536949
H       4.691327548    -0.225783218     2.312610410
C       4.197158338     2.136894615     0.043591124
N       1.876415215     1.701726405    -0.431550892
C      -1.478941271    -3.134581082     3.185609995
H       0.589663608    -3.120527046     3.812218866
C      -1.996710413    -1.490061178     1.523316706
C       4.215762812     3.118471801    -0.940915918
H       5.080036402     1.907020629     0.627022492
C       1.907295319     2.651328290    -1.374773843
C      -2.414361858    -2.529541574     2.348484937
H      -1.768030642    -3.948227955     3.840429859
H      -2.699324213    -0.996031079     0.863412031
C       3.053619303     3.383697788    -1.663945978
H       5.126287162     3.671515213    -1.139721445
H       0.979585775     2.822299276    -1.908432690
H      -3.447937928    -2.851026169     2.328982301
H       3.029071566     4.141650221    -2.436488493
C      -2.850544327     0.391922774    -1.320926041
C      -1.556309942    -1.262735042    -2.078643333
C      -3.634023225    -0.396067644    -2.117508039
C      -2.942424159     1.562457515    -0.470080734
C      -2.803745683    -1.456825796    -2.604063653
C      -0.241235113    -1.873596098    -2.085799714
H      -4.681676721    -0.250946142    -2.331550213
C      -4.102979702     2.322649643    -0.334744695
N      -1.801700749     1.858731674     0.205258169
H      -3.107214588    -2.260445613    -3.257046637
C       0.055575341    -3.012406151    -2.834585639
N       0.681328605    -1.248391398    -1.312164649
C      -4.083488957     3.419096500     0.519669797
H      -4.994557450     2.055417074    -0.888180668
C      -1.796347359     2.918631542     1.023917681
C       1.347630429    -3.522196370    -2.786453627
H      -0.711695820    -3.479268727    -3.439829224
C       1.920658240    -1.748840523    -1.282389166
C      -2.912564155     3.726282880     1.211499020
H      -4.972170867     4.026723700     0.643796986
H      -0.864907058     3.114538829     1.542302209
C       2.300584647    -2.879334213    -1.999039195
H       1.607271655    -4.405561886    -3.358015744
H       2.640090741    -1.225153951    -0.665739303
H      -2.859786444     4.571837461     1.885313891
H       3.319658191    -3.239404689    -1.936367225
O       1.589535545    -0.063901688     1.333649784
O      -1.591806017    -0.138112919    -1.307027667

Complex 1', Singlet
Fe      0.000016671     0.000000283    -0.000002238
O       3.483559010    -2.443509172    -0.059593160
O      -3.483510759    -2.443560184     0.058451241
N       1.414037480    -0.013400399     1.442593274
C       1.409106395     0.909562047     2.419671495
C       2.469636487     1.080521052     3.300462918
C       3.596910112     0.279188826     3.159188066
C       3.599195475    -0.699361974     2.169689822
C       2.483956128    -0.833218947     1.349130937
N       0.000031881    -1.998857142    -0.000529456
C       2.455136094    -1.982681365     0.388432279
C       1.147601391    -2.693192833     0.143203833
C       1.187650020    -4.086241536     0.114883633
C       0.000019289    -4.796351581    -0.000699764
C      -1.187592636    -4.086213347    -0.116203313
C      -1.147532222    -2.693157103    -0.144343128
C      -2.455068741    -1.982575984    -0.389374379
N      -1.414025573    -0.012718551    -1.442516554
C      -2.483905475    -0.832647880    -1.349516654
C      -3.599176753    -0.698315241    -2.169957877
C      -3.596986171     0.280930311    -3.158768375
C      -2.469788122     1.082457846    -3.299536143
C      -1.409200313     0.910927250    -2.418936606
O       3.483545463     2.443531201     0.059592456
O      -3.483523460     2.443540980    -0.058450845
N       1.414039819     0.013408694    -1.442595793
C       1.409116793    -0.909554972    -2.419673072
C       2.469653119    -1.080513352    -3.300457134
C       3.596924569    -0.279179169    -3.159175609
C       3.599201005     0.699373775    -2.169679493
C       2.483955927     0.833230060    -1.349128307
N       0.000021367     1.998858259     0.000525735
C       2.455126342     1.982695446    -0.388433711
C       1.147586987     2.693199871    -0.143209383
C       1.187628075     4.086248786    -0.114891902
C      -0.000006173     4.796352893     0.000691707
C      -1.187614147     4.086208330     0.116198547
C      -1.147546267     2.693152467     0.144340175
C      -2.455078160     1.982564364     0.389374841
N      -1.414023869     0.012710097     1.442512707
C      -2.483906030     0.832637143     1.349519486
C      -3.599171482     0.698302117     2.169967683
C      -3.596972724    -0.280943670     3.158777869
C      -2.469772866    -1.082470324     3.299537509
C      -1.409191037    -0.910937267     2.418931335
H       0.531771336     1.537358381     2.473784781
H       2.406223679     1.841860271     4.067185632
H       4.452209222     0.402129906     3.812457054
H       4.436456876    -1.370229434     2.030966515
H       2.143561327    -4.584536920     0.203777880
H       0.000012259    -5.879308224    -0.000741386
H      -2.143576335    -4.584494882    -0.205137554
H      -4.436438011    -1.369334082    -2.031662774
H      -4.452319407     0.404296267    -3.811907842
H      -2.406478240     1.844367042    -4.065709122
H      -0.531902852     1.538803744    -2.472610119
H       0.531784004    -1.537351883    -2.473791427
H       2.406246756    -1.841853916    -4.067179261
H       4.452228500    -0.402120059    -3.812438078
H       4.436459955     1.370243610    -2.030951909
H       2.143536631     4.584549329    -0.203787966
H      -0.000018899     5.879306319     0.000731284
H      -2.143600301     4.584484913     0.205133704
H      -4.436438148     1.369321164     2.031678046
H      -4.452301187    -0.404311193     3.811922882
H      -2.406457189    -1.844380552     4.065709349
H      -0.531892491    -1.538812735     2.472597895
67
Complex 1', Triplet
Fe      0.000003102     0.000000937     0.000004653
O      -3.480143356     2.451238667    -0.086949434
O       3.480103768     2.451356933     0.086958395
N      -1.490773287     0.041101003     1.538722341
C      -1.536604425    -0.904426387     2.486258821
C      -2.654936533    -1.104768359     3.288294118
C      -3.778768728    -0.311206028     3.080015239
C      -3.730703658     0.683433359     2.106546853
C      -2.559091232     0.843630826     1.372894703
N      -0.000017389     1.980618309     0.000028934
C      -2.473380728     1.980978398     0.399568859
C      -1.149035715     2.674105115     0.158939708
C      -1.185784315     4.067385206     0.131618721
C      -0.000053264     4.777045985     0.000062295
C       1.185695853     4.067418697    -0.131513192
C       1.148982787     2.674138469    -0.158868839
C       2.473343854     1.981052250    -0.399522043
N       1.490786585     0.041165464    -1.538703989
C       2.559073383     0.843737715    -1.372883876
C       3.730672627     0.683614486    -2.106573460
C       3.778756875    -0.310997051    -3.080069204
C       2.654957621    -1.104609818    -3.288332927
C       1.536638615    -0.904340025    -2.486261155
O      -3.480092021    -2.451339486     0.086916073
O       3.480157596    -2.451270751    -0.086981746
N      -1.490777605    -0.041119340    -1.538708524
C      -1.536638859     0.904426678    -2.486224816
C      -2.654978333     1.104753606    -3.288253768
C      -3.778787736     0.311155575    -3.079988669
C      -3.730693561    -0.683499602    -2.106538031
C      -2.559075499    -0.843678463    -1.372890724
N       0.000023615    -1.980616351    -0.000033884
C      -2.473338647    -1.981036507    -0.399579974
C      -1.148976532    -2.674130891    -0.158955213
C      -1.185689153    -4.067412204    -0.131649820
C       0.000060307    -4.777043931    -0.000101668
C       1.185791539    -4.067387582     0.131478374
C       1.149042483    -2.674108538     0.158849030
C       2.473386919    -1.980988072     0.399497765
N       1.490787278    -0.041146033     1.538715176
C       2.559093534    -0.843688623     1.372879590
C       3.730689714    -0.683548852     2.106570348
C       3.778748609     0.311045238     3.080085413
C       2.654927579     1.104622401     3.288368245
C       1.536612845     0.904339168     2.486293953
H      -0.653749481    -1.522813782     2.584337059
H      -2.641628308    -1.879668671     4.044087073
H      -4.675813051    -0.456665472     3.669846908
H      -4.569577731     1.339651807     1.916700100
H      -2.139265493     4.568022929     0.231396058
H      -0.000067070     5.860029769     0.000075233
H       2.139164071     4.568083298    -0.231279837
H       4.569522385     1.339865610    -1.916731888
H       4.675790905    -0.456398440    -3.669930878
H       2.641665552    -1.879493582    -4.044143161
H       0.653811157    -1.522768701    -2.584326936
H      -0.653802008     1.522842050    -2.584290963
H      -2.641693471     1.879669512    -4.044031160
H      -4.675837642     0.456602000    -3.669815078
H      -4.569550283    -1.339742773    -1.916699899
H      -2.139157419    -4.568073376    -0.231433017
H       0.000074520    -5.860027705    -0.000127654
H       2.139273071    -4.568028734     0.231235413
H       4.569556226    -1.339774687     1.916715499
H       4.675779253     0.456458424     3.669949309
H       2.641615058     1.879489131     4.044195565
H       0.653767489     1.522739411     2.584376647
67
Complex 1', Quintet
Fe      0.000268005    -0.000008227    -0.000000668
O      -3.473303921    -2.624534757     0.040610975
O       3.473280124    -2.625179972    -0.041712937
N      -1.550620694    -0.113810957    -1.512808861
C      -1.638229394     0.850712657    -2.439102586
C      -2.739402730     0.987909458    -3.277314558
C      -3.803281418     0.104560597    -3.130120198
C      -3.715791095    -0.903148583    -2.172451948
C      -2.564794566    -0.993790786    -1.394200235
N       0.000029434    -2.158184245    -0.000604195
C      -2.463104858    -2.144825193    -0.430580699
C      -1.143415663    -2.846106483    -0.183096430
C      -1.184908204    -4.241006819    -0.157381682
C      -0.000273807    -4.948883667    -0.001434006
C       1.184509490    -4.241361151     0.154985649
C       1.143310171    -2.846470160     0.181547178
C       2.463095592    -2.145574952     0.429612532
N       1.550913827    -0.114899283     1.512728659
C       2.564851723    -0.995126456     1.393926179
C       3.715641232    -0.905275309     2.172572663
C       3.803165835     0.101884986     3.130816912
C       2.739527626     0.985500320     3.278171857
C       1.638552891     0.849099375     2.439570876
O      -3.473339259     2.624495884    -0.040603024
O       3.473234858     2.625236314     0.041711449
N      -1.550618736     0.113808040     1.512815370
C      -1.638207439    -0.850726759     2.439097585
C      -2.739381462    -0.987953348     3.277305065
C      -3.803271893    -0.104619025     3.130122193
C      -3.715798350     0.903103571     2.172464754
C      -2.564808912     0.993767836     1.394209480
N      -0.000003633     2.158179477     0.000607635
C      -2.463135127     2.144802571     0.430589178
C      -1.143452340     2.846095073     0.183102107
C      -1.184964456     4.240994452     0.157388724
C      -0.000344988     4.948887964     0.001408316
C       1.184442137     4.241378100    -0.155029419
C       1.143261730     2.846485511    -0.181560301
C       2.463061904     2.145615731    -0.429618175
N       1.550908884     0.114935242    -1.512736983
C       2.564841917     0.995166583    -1.393929746
C       3.715634178     0.905315675    -2.172567874
C       3.803174672    -0.101860069    -3.130795994
C       2.739546470    -0.985484921    -3.278147822
C       1.638558654    -0.849075123    -2.439564272
H      -0.801368872     1.535018809    -2.492128883
H      -2.758357656     1.780708627    -4.014153820
H      -4.685933100     0.191763160    -3.752356801
H      -4.511734090    -1.621300285    -2.028174459
H      -2.134982576    -4.744247465    -0.275294847
H      -0.000389964    -6.032018976    -0.001777230
H       2.134458326    -4.744871349     0.272656483
H       4.511388659    -1.623596242     2.028149657
H       4.685663193     0.188469280     3.753359798
H       2.758517378     1.777888330     4.015451691
H       0.801866706     1.533604737     2.492721837
H      -0.801331972    -1.535014840     2.492120554
H      -2.758322921    -1.780760619     4.014135902
H      -4.685920928    -0.191840318     3.752359912
H      -4.511751850     1.621245780     2.028198114
H      -2.135044458     4.744220588     0.275318316
H      -0.000475895     6.032023157     0.001741099
H       2.134382987     4.744897300    -0.272726284
H       4.511375488     1.623644831    -2.028150985
H       4.685678200    -0.188446171    -3.753329899
H       2.758547954    -1.777882525    -4.015416998
H       0.801872135    -1.533579511    -2.492720768
67
Complex 2', Singlet
Fe     -0.000001986    -0.000000035    -0.000026185
O       3.544547964    -2.554502059     0.088674175
O      -3.544529178    -2.554531614    -0.088777715
N       1.428427364    -0.034115129     1.426254922
C       1.426088745     0.896795953     2.399351016
C       2.470838513     1.067770908     3.296068699
C       3.597528958     0.259258452     3.173387123
C       3.598539332    -0.724309293     2.192866551
C       2.489232263    -0.870442627     1.357281478
C       2.475178432    -2.079546845     0.450168803
C       1.176927556    -2.750661123     0.192657623
C       1.190178778    -4.154424622     0.153647642
C       0.000016011    -4.860741424     0.000027883
C      -1.190149033    -4.154436555    -0.153618662
C      -1.176902520    -2.750673739    -0.192674355
C      -2.475146962    -2.079566462    -0.450223241
N      -1.428372001    -0.034106955    -1.426239899
C      -2.489171846    -0.870449056    -1.357319663
C      -3.598442530    -0.724321940    -2.192953839
C      -3.597399881     0.259248609    -3.173470871
C      -2.470710076     1.067769141    -3.296102858
C      -1.425998657     0.896802552    -2.399340189
O       3.544533020     2.554519829    -0.088721657
O      -3.544543995     2.554513934     0.088734000
N       1.428373531     0.034129820    -1.426244074
C       1.426002970    -0.896764372    -2.399358732
C       2.470720919    -1.067722282    -3.296115489
C       3.597413968    -0.259209592    -3.173461235
C       3.598453955     0.724345441    -2.192928565
C       2.489177043     0.870464995    -1.357301386
C       2.475151227     2.079565864    -0.450182990
C       1.176907648     2.750673008    -0.192627856
C       1.190158002     4.154435200    -0.153551335
C      -0.000005025     4.860741361     0.000105650
C      -1.190169602     4.154425850     0.153716476
C      -1.176922201     2.750661721     0.192705569
C      -2.475173755     2.079547422     0.450211851
N      -1.428424877     0.034092141     1.426252684
C      -2.489226029     0.870426709     1.357302603
C      -3.598526235     0.724285882     2.192895550
C      -3.597512570    -0.259297522     3.173400337
C      -2.470825426    -1.067818052     3.296058613
C      -1.426082850    -0.896834430     2.399334236
H       0.555972382     1.536334619     2.423567536
H       2.401855210     1.835996136     4.056610486
H       4.448128424     0.382141479     3.834163078
H       4.433038677    -1.401386631     2.067310760
H       2.132692213    -4.681645298     0.263816350
H       0.000019313    -5.945639370     0.000046277
H      -2.132660213    -4.681663888    -0.263773752
H      -4.432939445    -1.401409735    -2.067438715
H      -4.447971994     0.382125809    -3.834283058
H      -2.401698558     1.835995152    -4.056641215
H      -0.555883533     1.536343689    -2.423519804
H       0.555885343    -1.536301556    -2.423554629
H       2.401711988    -1.835936154    -4.056666346
H       4.447991039    -0.382081107    -3.834268104
H       4.432953802     1.401426234    -2.067395148
H       2.132670612     4.681661671    -0.263698408
H      -0.000005074     5.945639317     0.000139634
H      -2.132681465     4.681647404     0.263894395
H      -4.433022658     1.401370353     2.067358804
H      -4.448106580    -0.382186193     3.834182266
H      -2.401839075    -1.836055568     4.056587705
H      -0.555969106    -1.536377228     2.423533663
C       0.000009602    -1.994900019    -0.000017536
C      -0.000007053     1.994899950     0.000017211
67
Complex 2', Triplet
Fe     -0.000066575    -0.000000109    -0.000093046
O       3.544057247    -2.597969977     0.112216070
O      -3.544488871    -2.597213835    -0.112539136
N       1.517544219    -0.057350176     1.528191264
C       1.572509707     0.912284600     2.452384257
C       2.673974895     1.111555141     3.274775206
C       3.786327728     0.289656848     3.105574789
C       3.730819257    -0.723904171     2.156382799
C       2.566792745    -0.890819722     1.401247727
C       2.491266991    -2.097026949     0.489927528
C       1.176131562    -2.740186335     0.219805297
C       1.184898616    -4.144704552     0.181961358
C      -0.000464062    -4.850868729    -0.000012318
C      -1.185660694    -4.144433725    -0.182080981
C      -1.176563731    -2.739924620    -0.220163017
C      -2.491611422    -2.096532312    -0.490315032
N      -1.517951315    -0.056565930    -1.528189862
C      -2.566933146    -0.890450351    -1.401852386
C      -3.730518007    -0.724140983    -2.157790479
C      -3.785771404     0.289196304    -3.107243989
C      -2.673618626     1.111482284    -3.275843890
C      -1.572641309     0.912840109    -2.452637912
O       3.543996794     2.597888134    -0.112118097
O      -3.544548355     2.597288851     0.112629782
N       1.517702014     0.057119805    -1.528163567
C       1.572744869    -0.912403072    -2.452481525
C       2.674243092    -1.111509685    -3.274864452
C       3.786554629    -0.289582129    -3.105546711
C       3.730930976     0.723911775    -2.156294485
C       2.566861072     0.890714580    -1.401200927
C       2.491235182     2.096928205    -0.489890299
C       1.176078184     2.740117283    -0.219820819
C       1.184911295     4.144639151    -0.181925670
C      -0.000411514     4.850868650     0.000057343
C      -1.185647909     4.144498972     0.182117371
C      -1.176616770     2.739993646     0.220148790
C      -2.491642802     2.096632321     0.490356865
N      -1.517794350     0.056794564     1.528217787
C      -2.566864623     0.890555372     1.401902049
C      -3.730404424     0.724135194     2.157884450
C      -3.785541837    -0.289269058     3.107277904
C      -2.673348651    -1.111527365     3.275758026
C      -1.572406031    -0.912723039     2.452541369
H       0.703425187     1.555570644     2.500893503
H       2.662612185     1.906203494     4.010950663
H       4.677076324     0.430740364     3.707475752
H       4.560403174    -1.399567081     1.995966327
H       2.123103024    -4.674219323     0.314014774
H      -0.000603226    -5.935798896     0.000073341
H      -2.123992391    -4.673752631    -0.314007266
H      -4.559951855    -1.400096502    -1.997817039
H      -4.676147258     0.429779214    -3.709813276
H      -2.662037800     1.905952183    -4.012209518
H      -0.703770375     1.556436786    -2.500740359
H       0.703696888    -1.555718433    -2.501142126
H       2.662937348    -1.906077915    -4.011127879
H       4.677331964    -0.430561194    -3.707428634
H       4.560445752     1.399646971    -1.995820200
H       2.123144702     4.674111958    -0.313930191
H      -0.000483069     5.935798790     0.000000205
H      -2.123950491     4.673859784     0.314093616
H      -4.559906505     1.400020094     1.997971263
H      -4.675887787    -0.429954995     3.709868311
H      -2.661710176    -1.906077127     4.012035947
H      -0.703499389    -1.556291479     2.500490635
C      -0.000108229    -1.982442478    -0.000264036
C      -0.000228414     1.982442293     0.000178929
67
Complex 2', Quintet
Fe     -0.094113599     0.088488813     0.052398550
O       3.382284441     2.939187499     0.023970169
O      -3.678158218     2.797431350     0.176128471
N       1.533503420     0.318964466    -1.483331150
C       1.704611262    -0.690467781    -2.344798037
C       2.887917266    -0.895086685    -3.047235775
C       3.948890581    -0.021758778    -2.824396300
C       3.774351951     1.031699104    -1.932629504
C       2.543112070     1.185137619    -1.289373278
C       2.367160489     2.395193758    -0.392384068
C       1.021148211     2.996325393    -0.136352545
C       1.003623682     4.402060696    -0.080465463
C      -0.191415993     5.079067351     0.138178719
C      -1.358784003     4.348427882     0.332628374
C      -1.320953002     2.942068875     0.340342288
C      -2.642226474     2.280095514     0.574776953
N      -1.725828188     0.203944834     1.596857579
C      -2.769696559     1.034422351     1.430324935
C      -3.993704778     0.810078700     2.066478724
C      -4.125156259    -0.278113541     2.923233304
C      -3.029443445    -1.114230577     3.119012467
C      -1.855572618    -0.839043273     2.424920245
H       0.860572720    -1.362496615    -2.445287482
H       2.972379256    -1.725144534    -3.738387274
H       4.894303737    -0.154336033    -3.338470806
H       4.566624229     1.739672925    -1.729466170
H       1.926498451     4.955247679    -0.221193620
H      -0.212799788     6.163777804     0.156755632
H      -2.302635923     4.859734919     0.491428482
H      -4.814099999     1.491516781     1.885427267
H      -5.064330724    -0.465854563     3.431546436
H      -3.079847014    -1.968980385     3.782851712
H      -0.984940239    -1.479166695     2.504633965
C      -0.135020164     2.216577040     0.089173562
O       3.481048694    -2.635765464     0.179087118
O      -3.573302612    -2.746996201    -0.165419128
N       1.497587221    -0.083728264     1.632851398
C       1.608967816     0.932165020     2.496532892
C       2.766759509     1.183564555     3.225768153
C       3.866157000     0.352623295     3.028690775
C       3.753679558    -0.707660357     2.135031689
C       2.544521936    -0.909997612     1.464026824
C       2.436297116    -2.127548457     0.566311446
C       1.119957592    -2.776979693     0.275806163
C       1.153962879    -4.182577453     0.224348001
C      -0.009896569    -4.902345479    -0.024146047
C      -1.196803732    -4.214359000    -0.252748136
C      -1.208804228    -2.807539460    -0.264383507
C      -2.545831226    -2.193530383    -0.536515266
N      -1.678446079    -0.084651796    -1.534696958
C      -2.694330299    -0.954329936    -1.398030203
C      -3.906625790    -0.777135546    -2.070533841
C      -4.054292843     0.305234579    -2.931969438
C      -2.986175636     1.182934564    -3.095833981
C      -1.823635901     0.952833994    -2.367143307
H       0.737216359     1.570711272     2.576594519
H       2.802462132     2.016838341     3.917297055
H       4.793534025     0.522884129     3.564094727
H       4.577552310    -1.384161823     1.951247424
H       2.091810035    -4.702162282     0.391708438
H       0.007880414    -5.987173060    -0.039471681
H      -2.117233370    -4.759390103    -0.435169455
H      -4.705270600    -1.489567758    -1.913015820
H      -4.984449313     0.456814957    -3.468169833
H      -3.049727427     2.035301376    -3.761612623
H      -0.976204455     1.625878848    -2.421738789
C      -0.056753282    -2.039612741     0.016307010
69
Complex 3', Singlet
Fe     -0.003768205    -0.000243622    -0.004316201
O      -3.515238955    -2.346111826     0.155045586
O       3.490617006    -2.373673311    -0.063776765
N      -1.407483176    -0.043093492    -1.445306064
C      -1.392694731     0.853291549    -2.447543105
C      -2.428178823     0.974821762    -3.364322711
C      -3.541759401     0.151265426    -3.233736725
C      -3.557442758    -0.790177647    -2.210001076
C      -2.464316568    -0.875558585    -1.351852935
C      -2.464939536    -1.971193785    -0.324635980
C      -1.173428885    -2.717718863    -0.059457976
C      -1.340475122    -4.073229063    -0.003414778
C       1.304016765    -4.078107865     0.193576886
C       1.147060445    -2.720183564     0.177887027
C       2.444390072    -1.970375412     0.401480266
N       1.401097070     0.012739698     1.435880232
C       2.453223749    -0.829043406     1.377837938
C       3.548538907    -0.711348690     2.229263174
C       3.539806118     0.275165681     3.209831208
C       2.430982822     1.109819191     3.305488662
C       1.393097319     0.953292071     2.396728837
O      -3.500632928     2.366713705    -0.165365495
O       3.505323317     2.351948735     0.052960186
N      -1.407511153     0.051130474     1.436438451
C      -1.398555781    -0.845339159     2.438626670
C      -2.435852660    -0.961654870     3.354061679
C      -3.545064351    -0.132451297     3.222071792
C      -3.554517731     0.809286522     2.198516645
C      -2.459839834     0.889180363     1.341852454
C      -2.453073748     1.985213991     0.315103811
C      -1.156803587     2.724161865     0.051889136
C      -1.315516188     4.080779194    -0.002075390
C       1.328943430     4.069632325    -0.199089182
C       1.163656067     2.712684853    -0.185574787
C       2.456148040     1.955225328    -0.411323000
N       1.400479081    -0.021859810    -1.444892755
C       2.457211342     0.814201536    -1.388100261
C       3.550763960     0.690714811    -2.241000044
C       3.535425356    -0.295598520    -3.221674819
C       2.422097212    -1.124406046    -3.315835844
C       1.386278632    -0.962410149    -2.405704117
H      -0.528626258     1.500376303    -2.483277008
H      -2.359186905     1.715145254    -4.151253829
H      -4.377869048     0.233502260    -3.918017551
H      -4.389659518    -1.467025274    -2.069230927
H      -2.319011243    -4.528765490    -0.072886117
H       2.279444536    -4.536845920     0.282825084
H       4.376939426    -1.398262226     2.117639682
H       4.377655868     0.383483289     3.888328916
H       2.367688545     1.884966253     4.058624555
H       0.532741106     1.606282310     2.404250435
H      -0.537883480    -1.496871303     2.475368857
H      -2.371688997    -1.702401402     4.141009340
H      -4.382532094    -0.210552197     3.905174262
H      -4.383002850     1.490498162     2.056779498
H      -2.291324458     4.542181068     0.067147486
H       2.307097590     4.522420967    -0.288841805
H       4.383023080     1.373109401    -2.130394949
H       4.371732338    -0.408277717    -3.901362678
H       2.353693930    -1.899180498    -4.068902870
H       0.522459948    -1.610819343    -2.412136499
N       0.001739367     2.015005636    -0.049994151
N      -0.010554020    -2.015554758     0.041793384
S       0.008620689     5.192486633    -0.138032458
S      -0.023556536    -5.192710559     0.138505697
O      -0.082309872     5.959453065    -1.404148285
O       0.102261242     6.043586526     1.072896698
O       0.064392552    -6.050937697    -1.067794398
O      -0.119339263    -5.952224133     1.408777305
69
Complex 3', Triplet
Fe     -0.003388910    -0.000335577    -0.005484238
O      -3.508092724    -2.377941311     0.198030759
O       3.495551869    -2.347997258    -0.094949181
N      -1.504205328    -0.086797291    -1.531281241
C      -1.543276471     0.823047442    -2.513472997
C      -2.629870165     0.950219499    -3.371107260
C      -3.731332781     0.119792833    -3.182517901
C      -3.693787806    -0.827623994    -2.163514520
C      -2.550071555    -0.914648524    -1.372934005
C      -2.483435179    -1.988074903    -0.323811299
C      -1.166280611    -2.705228164    -0.065923261
C      -1.318212589    -4.062255547    -0.011485621
C       1.323478633    -4.046008992     0.215438722
C       1.159796227    -2.689588681     0.194605016
C       2.469431721    -1.947394130     0.415646872
N       1.473726134    -0.008168903     1.548259913
C       2.531778967    -0.824529699     1.413922834
C       3.686232822    -0.675961689     2.178763809
C       3.720581747     0.323861409     3.146794640
C       2.607003757     1.143232959     3.311930135
C       1.509326362     0.951748916     2.480607971
O      -3.487142037     2.399595782    -0.226146615
O       3.516143922     2.324131143     0.067496075
N      -1.507296702     0.095910635     1.516579428
C      -1.556936842    -0.814937526     2.497282540
C      -2.652562395    -0.942469471     3.343387873
C      -3.751735287    -0.111543443     3.143974099
C      -3.702899274     0.837563360     2.126939564
C      -2.550825442     0.925076718     1.348840625
C      -2.469894487     2.001474024     0.303740907
C      -1.145850307     2.711988488     0.064269662
C      -1.286834804     4.071053425     0.032064490
C       1.354556824     4.036637999    -0.193895788
C       1.180177302     2.681494535    -0.195484456
C       2.482622030     1.932244548    -0.435007508
N       1.470332595    -0.002695860    -1.561369135
C       2.530325143     0.812618100    -1.437710085
C       3.675466569     0.665105122    -2.216794505
C       3.697878055    -0.332762407    -3.187129570
C       2.582372648    -1.151871973    -3.340012257
C       1.494734549    -0.961311233    -2.495498964
H      -0.680758707     1.473220611    -2.586307033
H      -2.612759024     1.696821768    -4.155204344
H      -4.604133908     0.204972399    -3.819177668
H      -4.520019714    -1.501271200    -1.978399839
H      -2.291489419    -4.529030565    -0.078514312
H       2.299505025    -4.500421631     0.317969720
H       4.523447063    -1.341116411     2.013782728
H       4.601934801     0.458661249     3.762821306
H       2.589284125     1.929174294     4.056514223
H       0.635318430     1.588354506     2.531607138
H      -0.695622194    -1.465799811     2.578132684
H      -2.644070313    -1.689927579     4.126805192
H      -4.631379613    -0.197476033     3.771031930
H      -4.526644399     1.512123402     1.934165599
H      -2.256945662     4.544565790     0.097904769
H       2.333321718     4.484946733    -0.297022075
H       4.514950377     1.329508671    -2.060613911
H       4.571625568    -0.466384615    -3.814155359
H       2.555559985    -1.936684959    -4.085510324
H       0.619855845    -1.597311804    -2.537306895
N       0.009559415     1.993411613    -0.050145232
N      -0.005253192    -1.994173723     0.041937485
S       0.051511772     5.171038985    -0.043227192
S       0.007811739    -5.171769816     0.120517300
O      -0.041292359     6.022723502    -1.253316572
O       0.170745565     5.935187644     1.222070060
O       0.119078187    -6.001144291    -1.103641069
O      -0.095719014    -5.959290395     1.372624458
69
Complex 3', Quintet
Fe     -0.003838729    -0.000234755    -0.004222126
O      -3.501224908    -2.429811986     0.217689419
O       3.471344018    -2.466500598    -0.123930775
N      -1.524570311    -0.146097054    -1.558120935
C      -1.601427247     0.777819168    -2.524562768
C      -2.709545758     0.900819208    -3.354548522
C      -3.791394685     0.048973857    -3.150345970
C      -3.717760010    -0.907913564    -2.141840713
C      -2.555320770    -0.990242367    -1.377222748
C      -2.476548959    -2.068639191    -0.325618000
C      -1.176121338    -2.818157819    -0.076926095
C      -1.346948594    -4.172984693    -0.027520538
C       1.302802536    -4.178543006     0.229461726
C       1.144712988    -2.821426266     0.202102058
C       2.452403958    -2.071331549     0.406239283
N       1.518867607    -0.087686328     1.552784982
C       2.543948831    -0.945355455     1.405671241
C       3.710765927    -0.835090367     2.159939399
C       3.794675039     0.165946668     3.123858539
C       2.718425907     1.032035682     3.294785942
C       1.605578298     0.878338438     2.476234861
O      -3.485611662     2.450720042    -0.227737450
O       3.487075668     2.444716473     0.113279336
N      -1.523935553     0.154797083     1.549463236
C      -1.606989042    -0.769015766     2.515483929
C      -2.717122602    -0.886798838     3.343538641
C      -3.794418747    -0.029590736     3.137712790
C      -3.714309917     0.927327944     2.129723206
C      -2.550145814     1.004192351     1.367179500
C      -2.463797297     2.082823595     0.316432695
C      -1.158553740     2.824728824     0.070061542
C      -1.320877806     4.180722295     0.023910086
C       1.328812485     4.170161135    -0.233611952
C       1.162227960     2.814008879    -0.209314491
C       2.465054278     2.056131579    -0.415839497
N       1.518778133     0.078058800    -1.561737226
C       2.548670595     0.930143325    -1.415975036
C       3.713670068     0.813835969    -2.172157974
C       3.790685169    -0.187350444    -3.136489041
C       2.709560437    -1.047643351    -3.305905908
C       1.598849879    -0.888186219    -2.485563435
H      -0.750432872     1.442807527    -2.606205493
H      -2.724062115     1.658467533    -4.127920544
H      -4.679841905     0.126184605    -3.766100618
H      -4.533027557    -1.591355322    -1.945395761
H      -2.321839557    -4.634596211    -0.107956740
H       2.273550904    -4.644287033     0.332975562
H       4.521296280    -1.531307182     1.990562316
H       4.686692347     0.266025557     3.731120533
H       2.740904080     1.823664577     4.033133216
H       0.758993594     1.551686817     2.531553612
H      -0.759437378    -1.438238204     2.598343555
H      -2.736729697    -1.644600804     4.116645645
H      -4.684316659    -0.102648626     3.751873127
H      -4.525813199     1.614919022     1.932167818
H      -2.292888595     4.648279299     0.104934302
H       2.302414859     4.629978441    -0.336780089
H       4.528226015     1.505603325    -2.003865736
H       4.681181998    -0.292035490    -3.745208368
H       2.726611956    -1.839200733    -4.044476299
H       0.748551351    -1.556931339    -2.539707206
N       0.000793614     2.120301777    -0.052108810
N      -0.012356878    -2.120761119     0.043784583
S       0.004790742     5.290356063    -0.142086535
S      -0.028512083    -5.290479435     0.143218637
O      -0.116734751     6.056524115    -1.406073448
O       0.127241661     6.140259634     1.067013185
O       0.088074642    -6.146590605    -1.062074569
O      -0.154768836    -6.050168485     1.410661218
67
Complex 4', Singlet
Fe      0.000377213     0.000351571    -0.002383936
O       3.497386003    -2.407870452    -0.109799782
O      -3.495653635    -2.409308639     0.105869205
N       1.407060987    -0.023666551     1.428860993
C       1.403111743     0.901215509     2.405189677
C       2.459403115     1.062178595     3.292473723
C       3.575370853     0.244239376     3.163210786
C       3.577217549    -0.734537516     2.172640409
C       2.471085707    -0.853125382     1.339194249
C       2.464400929    -1.982616556     0.353584482
C       1.193171105    -2.757409926     0.100115062
C       1.224889844    -4.097673864     0.064187996
C       0.001385876    -4.903387017    -0.001275548
C      -1.222444442    -4.098206979    -0.067146698
C      -1.191278932    -2.757946782    -0.103761397
C      -2.462822118    -1.983808771    -0.357637063
N      -1.406290601    -0.024826084    -1.433634282
C      -2.469945140    -0.854727884    -1.343706474
C      -3.576083205    -0.736971525    -2.177262094
C      -3.574644960     0.241432205    -3.168199816
C      -2.459052805     1.059845818    -3.297701465
C      -1.402728884     0.899691055    -2.410310652
O       3.496656453     2.410271763     0.095410649
O      -3.496970096     2.408557329    -0.101035473
N       1.403196020     0.024985410    -1.437345339
C       1.397053093    -0.900031777    -2.413535421
C       2.467145718     0.854842271    -1.350529685
C       2.462598424     1.984440392    -0.365045515
C       1.191694246     2.758614704    -0.108023986
C      -1.192181846     2.758074208     0.102461684
C      -2.462738355     1.983365850     0.359615121
N      -1.402432883     0.024784023     1.432590983
C      -2.466781935     0.854095110     1.345476625
H       0.530670546     1.536087954     2.456689838
H       2.399409422     1.826893531     4.055718886
H       4.425489339     0.355141242     3.824988203
H       4.409389938    -1.413300018     2.043458722
H       2.183543428    -4.594517954     0.133889571
H      -2.180896600    -4.595476188    -0.136591334
H      -4.407944728    -1.416072971    -2.047864985
H      -4.424780348     0.351684574    -3.830064050
H      -2.399372924     1.824307940    -4.061225250
H      -0.530571400     1.534929008    -2.462012985
H       0.524723321    -1.535252415    -2.462585274
O       0.001632085    -6.123620768    -0.000972174
C      -1.224023878     4.098326403     0.066185758
H      -2.182498329     4.595161783     0.138351447
C       1.222919972     4.098886559    -0.071872681
H       2.181169772     4.596153090    -0.144053705
C      -0.000737918     4.904055124    -0.002901985
O      -0.001016238     6.124289384    -0.002995668
O      -0.000083162     2.046932283    -0.002749816
O       0.000803044    -2.046265277    -0.002000671
C      -3.570756904     0.735534814     2.181789507
H      -4.403370558     1.414134965     2.054605834
C      -3.566213209    -0.243026797     3.172565380
H      -4.414621130    -0.353928003     3.836534173
C      -2.449814413    -1.060797734     3.299144949
H      -2.387765687    -1.825359706     4.062373474
C      -1.395843378    -0.899894270     2.409102832
H      -0.523212866    -1.534690005     2.458370251
C       3.571167202     0.736526502    -2.186815801
H       4.403446844     1.415581074    -2.059876471
C       3.567102957    -0.242393324    -3.177239004
H       4.415562451    -0.353117147    -3.841171310
C       2.451101272    -1.060750346    -3.303521276
H       2.389421075    -1.825614822    -4.066477593
67
Complex 4', Triplet
Fe      0.000378488     0.000294642    -0.002326870
O       3.478889444    -2.550483545    -0.124792691
O      -3.477019861    -2.551942503     0.120858158
N       1.434585743    -0.116871055     1.410524516
C       1.469626805     0.813697706     2.382099321
C       2.523332304     0.926516800     3.279121026
C       3.593588927     0.048062767     3.166502613
C       3.555886728    -0.931859913     2.177571139
C       2.457517821    -0.999616493     1.326659379
C       2.440831614    -2.138932487     0.341142184
C       1.185124537    -2.939904312     0.101186810
C       1.227737834    -4.281705605     0.067271372
C       0.001472290    -5.085947565    -0.001561258
C      -1.225130165    -4.282240434    -0.070642637
C      -1.183085448    -2.940431002    -0.104978043
C      -2.439137591    -2.140073409    -0.345186383
N      -1.433753712    -0.117892242    -1.415153044
C      -2.456311413    -1.001048409    -1.331032965
C      -3.554716702    -0.933989761    -2.181951261
C      -3.592831643     0.045625815    -3.171170818
C      -2.522939655     0.924492459    -3.284050349
C      -1.469183899     0.812381050    -2.386997634
O       3.477983165     2.552734284     0.110807978
O      -3.478637138     2.550845767    -0.116134004
N       1.430743271     0.118143925    -1.419048878
C       1.463639382    -0.812469327    -2.390645665
C       2.453576133     1.001251042    -1.337840079
C       2.438915427     2.140609508    -0.352358578
C       1.183421179     2.940953866    -0.109137471
C      -1.184252781     2.940373147     0.103285094
C      -2.439280929     2.139483678     0.347064968
N      -1.430007895     0.117878631     1.414393129
C      -2.453221526     1.000526275     1.333029107
H       0.628467014     1.490709981     2.423500505
H       2.495627745     1.698148929     4.037237991
H       4.440219220     0.113525219     3.838818726
H       4.355275213    -1.651250879     2.062916134
H       2.185732475    -4.779476088     0.138132197
H      -2.182915321    -4.780435645    -0.141349579
H      -4.353800406    -1.653683898    -2.067077594
H      -4.439494453     0.110537265    -3.843499066
H      -2.495564730     1.695913510    -4.042394574
H      -0.628323400     1.489757886    -2.428584803
H       0.622601333    -1.489755367    -2.429891002
O       0.001727785    -6.307284736    -0.001373388
C      -1.227027424     4.282159010     0.068827428
H      -2.184865799     4.779900208     0.141974384
C       1.225463626     4.282783936    -0.075525999
H       2.183028634     4.781006230    -0.148974042
C      -0.001000966     5.086441679    -0.003602285
O      -0.001336697     6.307780205    -0.003982548
O      -0.000221527     2.242744477    -0.002709590
O       0.000873549    -2.242237562    -0.002003640
C      -3.549365678     0.932852369     2.186815098
H      -4.349141297     1.652115385     2.074056986
C      -3.584364924    -0.046827221     3.176085890
H      -4.429240867    -0.112248602     3.850611419
C      -2.513711566    -0.925123704     3.286133175
H      -2.483920287    -1.696566885     4.044360779
C      -1.462386507    -0.812427294     2.386305576
H      -0.621080462    -1.489372444     2.425631946
C       3.549892140     0.933720637    -2.191412563
H       4.349346179     1.653361936    -2.078784788
C       3.585467253    -0.046319125    -3.180308417
H       4.430495118    -0.111654110    -3.854651867
C       2.515170079    -0.925062388    -3.290249729
H       2.485818255    -1.696778238    -4.048217100
67
Complex 4', Quintet
Fe      0.000030458    -0.000001717    -0.000013723
O      -3.470992152    -2.522298890     0.259395873
O       3.470835632    -2.522635680    -0.260744217
N      -1.491134604    -0.204582473    -1.516942222
C      -1.570149286     0.716240955    -2.490670963
C      -2.706134306     0.880123135    -3.274899140
C      -3.810594631     0.073587062    -3.025723097
C      -3.730882070    -0.892859039    -2.024492418
C      -2.548426067    -1.017379754    -1.303524196
C      -2.467587735    -2.122204587    -0.286423233
C      -1.190071365    -2.907141496    -0.082966109
C      -1.227022032    -4.248302876    -0.047200674
C      -0.000260009    -5.052220726    -0.001978059
C       1.226599759    -4.248498725     0.044009132
C       1.189824176    -2.907362830     0.081032620
C       2.467420705    -2.122755873     0.285214747
N       1.491242297    -0.205599692     1.516730731
C       2.548337499    -1.018570350     1.303009725
C       3.730709791    -0.894807877     2.024251843
C       3.810548693     0.071049632     3.026036571
C       2.706299341     0.877794316     3.275463375
C       1.570390496     0.714673336     2.490970112
O      -3.471034438     2.522242993    -0.259368508
O       3.470795758     2.522691063     0.260803648
N      -1.491100027     0.204566802     1.516947715
C      -1.570090960    -0.716252708     2.490682436
C      -2.706052479    -0.880124273     3.274946051
C      -3.810515588    -0.073582605     3.025800674
C      -3.730829544     0.892856250     2.024561095
C      -2.548396269     1.017369425     1.303554021
C      -2.467603589     2.122178583     0.286424986
C      -1.190107042     2.907126256     0.082895452
C      -1.227076039     4.248284715     0.047031908
C      -0.000327605     5.052219593     0.001745227
C       1.226546354     4.248511525    -0.044147249
C       1.189790372     2.907373800    -0.081074943
C       2.467408455     2.122780533    -0.285182395
N       1.491287552     0.205613499    -1.516701314
C       2.548375796     1.018579976    -1.302950531
C       3.730774075     0.894808824    -2.024148252
C       3.810644358    -0.071056483    -3.025923295
C       2.706398948    -0.877795105    -3.275387390
C       1.570463316    -0.714662535    -2.490935218
H      -0.696670785     1.340674278    -2.628897278
H      -2.718292205     1.636209848    -4.049043617
H      -4.719847850     0.185887173    -3.603505766
H      -4.558436085    -1.553857206    -1.805347563
H      -2.185137172    -4.748392864    -0.096871334
H       2.184653351    -4.748752504     0.093217340
H       4.558104217    -1.555929649     1.804878214
H       4.719734659     0.182738777     3.604043183
H       2.718559837     1.633451676     4.050025140
H       0.697070605     1.339276213     2.629437457
H      -0.696616021    -1.340695625     2.628885234
H      -2.718190942    -1.636208403     4.049093365
H      -4.719751667    -0.185874268     3.603612083
H      -4.558388676     1.553855100     1.805437380
H      -2.185197969     4.748364702     0.096668427
H       2.184594120     4.748775655    -0.093366495
H       4.558162601     1.555929771    -1.804750143
H       4.719850400    -0.182754352    -3.603896526
H       2.718682251    -1.633454205    -4.049947044
H       0.697138536    -1.339252940    -2.629428159
O      -0.000080136    -2.204275337    -0.000641027
O      -0.000333143    -6.273370192    -0.002551106
O      -0.000106548     2.204272447     0.000612717
O      -0.000421348     6.273361514     0.002206520
63
Complex 5', Singlet
Fe      0.000018841    -0.000000151    -0.000057982
O      -3.241850711     3.097923527     0.595561388
O       3.241463977     3.098583088    -0.594663253
N      -1.468230931     0.081471356     1.428995531
C      -1.582810824    -0.936862690     2.297996483
C      -2.673762308    -1.111462218     3.142196884
C      -3.716513628    -0.198007380     3.083823786
C      -3.589230031     0.892438195     2.230166194
C      -2.447207808     1.021374767     1.441492739
C      -2.319390022     2.334212657     0.722822755
C      -0.644777197     4.105288793     0.188545336
C       0.644284073     4.105439598    -0.187167892
C       2.319110426     2.334779258    -0.722144440
N       1.468248097     0.082168164    -1.429092291
C       2.447089669     1.022216233    -1.441287852
C       3.589110733     0.893716306    -2.230034530
C       3.716529424    -0.196415113    -3.084073525
C       2.673910504    -1.110002625    -3.142731951
C       1.582955639    -0.935851375    -2.298444305
O      -3.241527246    -3.098126101    -0.595113456
O       3.241785558    -3.098380435     0.595112974
N      -1.468228872    -0.081651018    -1.429089746
C      -1.582976584     0.936717135    -2.298027789
C      -2.673997512     1.111238196    -3.142152158
C      -3.716634529     0.197654157    -3.083770037
C      -3.589164085    -0.892833691    -2.230194844
C      -2.447073677    -1.021692300    -1.441606014
C      -2.318990515    -2.334636295    -0.723158253
C      -0.644213332    -4.105396259    -0.188383619
C       0.644849488    -4.105332244     0.187323932
C       2.319508807    -2.334355244     0.721810629
N       1.468246197    -0.081990717     1.429004564
C       2.447222673    -1.021898229     1.441176121
C       3.589179838    -0.893317185     2.230000572
C       3.716412746     0.196771517     3.084122204
C       2.673676026     1.110225319     3.142779228
C       1.582786382     0.935993030     2.298421370
H      -0.768576252    -1.645880672     2.307394665
H      -2.693754465    -1.960382149     3.813507969
H      -4.597960712    -0.311663667     3.702945101
H      -4.346730160     1.662591369     2.184766880
H      -1.338628161     4.903198460     0.386185454
H       1.338035880     4.903510744    -0.384503408
H       4.346503344     1.663960483    -2.184386058
H       4.597977169    -0.309731987    -3.703256077
H       2.694008713    -1.958690396    -3.814333003
H       0.768826585    -1.644988612    -2.308062392
H      -0.768839603     1.645848377    -2.307409630
H      -2.694138139     1.960204568    -3.813400133
H      -4.598132266     0.311241081    -3.702831947
H      -4.346553002    -1.663097088    -2.184826741
H      -1.337959281    -4.903421223    -0.385924796
H       1.338708485    -4.903287526     0.384753029
H       4.346685921    -1.663448536     2.184315259
H       4.597813468     0.310160923     3.703358436
H       2.693626552     1.958865443     3.814444871
H       0.768557938     1.645014822     2.308061677
C      -0.000110869     1.921731575     0.000272955
C       0.000161105    -1.921731607    -0.000378473
N      -1.017775050    -2.754853392    -0.324601879
N       1.018276043    -2.754752324     0.323522292
N      -1.018189650     2.754677933     0.324488364
N       1.017862433     2.754927879    -0.323633381
63
Complex 5', Triplet
Fe      0.000033729     0.000008408    -0.000033407
O      -3.206386873     3.198491343     0.681384697
O       3.206312900     3.198718027    -0.679794726
N      -1.568267029     0.119007118     1.507491106
C      -1.759896702    -0.942246666     2.302573226
C      -2.913426036    -1.132785355     3.057724739
C      -3.926463770    -0.186757610     2.974143713
C      -3.722266679     0.940041188     2.183523472
C      -2.523632406     1.073081974     1.483575789
C      -2.321166386     2.388469392     0.788820138
C      -0.636286110     4.111599004     0.212296229
C       0.635974662     4.111753704    -0.210745957
C       2.320900030     2.389065309    -0.788434601
N       1.568308210     0.119600995    -1.507514713
C       2.523566539     1.073779096    -1.483348629
C       3.722231425     0.941021748    -2.183299562
C       3.926544152    -0.185543358    -2.974221930
C       2.913597135    -1.131642957    -3.058076626
C       1.760043495    -0.941417906    -2.302884636
O      -3.206284472    -3.198545700    -0.681201412
O       3.206364521    -3.198741919     0.680145227
N      -1.568274665    -0.119061758    -1.507536139
C      -1.759969014     0.942190150    -2.302605246
C      -2.913523463     1.132683938    -3.057728777
C      -3.926515682     0.186609035    -2.974133420
C      -3.722247168    -0.940190993    -2.183533278
C      -2.523588495    -1.073189275    -1.483618467
C      -2.321027694    -2.388601496    -0.788927953
C      -0.636101046    -4.111617631    -0.212191702
C       0.636162097    -4.111689128     0.210846655
C       2.321086279    -2.388859364     0.788158857
N       1.568317158    -0.119533755     1.507457297
C       2.523626103    -1.073661031     1.483264606
C       3.722258762    -0.940896804     2.183268451
C       3.926499992     0.185639020     2.974251326
C       2.913515457     1.131698928     3.058108435
C       1.759992668     0.941464135     2.302869803
H      -0.959498081    -1.668951947     2.327275736
H      -3.006046410    -2.013307215     3.680619051
H      -4.851041601    -0.308444634     3.525347779
H      -4.463552659     1.724350752     2.118429882
H      -1.322140894     4.909807598     0.433566773
H       1.321748848     4.910125729    -0.431674282
H       4.463428186     1.725398936    -2.118017541
H       4.851136620    -0.306984514    -3.525455467
H       3.006313612    -2.011990379    -3.681203168
H       0.959724929    -1.668206288    -2.327764500
H      -0.959607357     1.668936040    -2.327312594
H      -3.006200146     2.013210386    -3.680608261
H      -4.851111738     0.308259479    -3.525315018
H      -4.463491084    -1.724540176    -2.118442053
H      -1.321924164    -4.909870782    -0.433398660
H       1.321973970    -4.910016369     0.431821587
H       4.463500138    -1.725229430     2.117949807
H       4.851070272     0.307092823     3.525519265
H       3.006175074     2.012018843     3.681282243
H       0.959639859     1.668213909     2.327767257
C      -0.000042859     1.925881155     0.000307362
C       0.000049297    -1.925859554    -0.000359494
N      -1.008629804    -2.762497764    -0.361623540
N       1.008708800    -2.762618258     0.360673034
N      -1.008770036     2.762452673     0.361590500
N       1.008551586     2.762711134    -0.360755352
63
Complex 5', Quintet
Fe     -0.000030430    -0.000027017    -0.000004516
O       3.170409597    -3.388627153     0.772595983
O      -3.170415825    -3.388623047    -0.772820582
N       1.661711046    -0.219769351     1.506602342
C       1.917570496     0.865359028     2.247693332
C       3.070225365     1.014202876     3.014353142
C       4.011232138    -0.006382778     2.998709738
C       3.744691171    -1.149724397     2.251400313
C       2.551994516    -1.232809145     1.531200685
C       2.306376571    -2.553087293     0.852925459
C       0.629162151    -4.260734344     0.231111608
C      -0.629206634    -4.260727132    -0.231189566
C      -2.306397277    -2.553053891    -0.853005725
N      -1.661730223    -0.219717215    -1.506617318
C      -2.551966432    -1.232795281    -1.531330862
C      -3.744578324    -1.149760804    -2.251674983
C      -4.011086974    -0.006420644    -2.998998256
C      -3.070137845     1.014220551    -3.014495750
C      -1.917567665     0.865421852    -2.247699491
O       3.170247086     3.388806809    -0.772879024
O      -3.170475162     3.388544268     0.772812734
N       1.661620847     0.219871375    -1.506667188
C       1.917488299    -0.865288674    -2.247711160
C       3.070168876    -1.014170152    -3.014324382
C       4.011191571     0.006403864    -2.998677755
C       3.744647064     1.149767356    -2.251402451
C       2.551931687     1.232882193    -1.531238632
C       2.306313842     2.553136618    -0.852931200
C       0.629047574     4.260739890    -0.231159256
C      -0.629344231     4.260700757     0.231071063
C      -2.306438220     2.552997989     0.853026886
N      -1.661624372     0.219746063     1.506716518
C      -2.551937534     1.232752709     1.531404005
C      -3.744538350     1.149644862     2.251759662
C      -4.010951563     0.006301966     2.999113918
C      -3.069921417    -1.014265790     3.014633373
C      -1.917367694    -0.865398150     2.247827489
H       1.169805243     1.646875203     2.219148005
H       3.216938741     1.916080397     3.594995835
H       4.931305999     0.073419352     3.564969785
H       4.436504724    -1.980079448     2.232312368
H       1.307543451    -5.059924466     0.470417554
H      -1.307601798    -5.059908618    -0.470483791
H      -4.436355798    -1.980148585    -2.232676801
H      -4.931097386     0.073344387    -3.565366753
H      -3.216834641     1.916108501    -3.595126324
H      -1.169853615     1.646983420    -2.219030924
H       1.169710907    -1.646796006    -2.219148434
H       3.216894258    -1.916067913    -3.594932688
H       4.931288525    -0.073436324    -3.564894928
H       4.436477678     1.980108304    -2.232292338
H       1.307413511     5.059945718    -0.470456345
H      -1.307780549     5.059863130     0.470314593
H      -4.436378526     1.979979444     2.232740064
H      -4.930951275    -0.073524869     3.565491041
H      -3.216545578    -1.916148084     3.595291295
H      -1.169590736    -1.646900709     2.219172680
C       0.000002799    -2.075438467    -0.000066023
C      -0.000052076     2.075418141     0.000033039
N       0.994808134    -2.910374441     0.393076725
N      -0.994834577    -2.910362222    -0.393157095
N       0.994727731     2.910386940    -0.393117446
N      -0.994898412     2.910327466     0.393142214
63
Complex 6', Singlet
Fe     -0.000001364     0.000001088     0.000001680
O      -3.353335839     2.966731692     0.638456509
O       3.353309438     2.966601191    -0.639031248
N      -1.445503632     0.031673772     1.433478186
C      -1.503384067    -0.997594237     2.297961272
C      -2.555805295    -1.197388103     3.181510946
C      -3.617248186    -0.299661572     3.168039931
C      -3.546821584     0.790855624     2.310513075
C      -2.440175297     0.950578815     1.474440418
C      -2.345885470     2.266981878     0.727842223
C      -0.670334170     4.117567583     0.173499671
C       0.670281046     4.117540129    -0.174361321
C       2.345844348     2.266865544    -0.728365553
N       1.445500573     0.031375415    -1.433477821
C       2.440160903     0.950283529    -1.474646363
C       3.546811562     0.790381147    -2.310679210
C       3.617254367    -0.300332485    -3.167954961
C       2.555822578    -1.198075218    -3.181223640
C       1.503395603    -0.998089959    -2.297724439
O      -3.353314248    -2.966772354    -0.638384964
O       3.353359858    -2.966567901     0.638946707
N      -1.445539039    -0.031685923    -1.433436465
C      -1.503454024     0.997586532    -2.297911661
C      -2.555899875     1.197372026    -3.181433840
C      -3.617330468     0.299630973    -3.167942239
C      -3.546869295    -0.790889628    -2.310422485
C      -2.440200941    -0.950602274    -1.474377218
C      -2.345876723    -2.267005850    -0.727785146
C      -0.670288486    -4.117573092    -0.173492172
C       0.670335530    -4.117529826     0.174335287
C       2.345893953    -2.266834211     0.728288145
N       1.445539568    -0.031362097     1.433445636
C       2.440211826    -0.950259076     1.474581348
C       3.546883890    -0.790349582     2.310584524
C       3.617336670     0.300357610     3.167867498
C       2.555893388     1.198086034     3.181173548
C       1.503445208     0.998096029     2.297700536
H      -0.674799161    -1.688569578     2.258022998
H      -2.536309211    -2.048763893     3.850619981
H      -4.470178677    -0.432003875     3.823895717
H      -4.322249295     1.544241786     2.284836481
H      -1.316994894     4.965739385     0.346950778
H       1.316932637     4.965684308    -0.347981237
H       4.322228250     1.543784408    -2.285176409
H       4.470188758    -0.432815133    -3.823777324
H       2.536340120    -2.049606131    -3.850135667
H       0.674820265    -1.689067989    -2.257626062
H      -0.674877866     1.688573515    -2.257987040
H      -2.536431811     2.048752409    -3.850537837
H      -4.470278946     0.431965988    -3.823776075
H      -4.322286941    -1.544285649    -2.284730418
H      -1.316943940    -4.965752461    -0.346925900
H       1.317001377    -4.965666459     0.347938838
H       4.322309785    -1.543742428     2.285053296
H       4.470287233     0.432845223     3.823667853
H       2.536417565     2.049609803     3.850094863
H       0.674859069     1.689062438     2.257634301
N      -0.000014377     1.948799815    -0.000212925
C       1.048876329     2.755991245    -0.299283476
C      -1.048918160     2.756039225     0.298679759
C       1.048919145    -2.755976375     0.299244228
C      -1.048891855    -2.756049116    -0.298661070
N       0.000010161    -1.948797397     0.000205303
63
Complex 6', Triplet
Fe      0.001998482    -0.000161137     0.000001193
O      -3.261978966     3.127625080     0.862678946
O       3.342209311     3.043109796    -0.706442069
N      -1.572324802     0.039120579     1.499981669
C      -1.744472324    -1.070231979     2.234312499
C      -2.878366755    -1.304918166     3.003546407
C      -3.892807412    -0.352809379     2.997251103
C      -3.708676884     0.811517189     2.261053892
C      -2.526922798     0.990718500     1.537868344
C      -2.316038971     2.340140992     0.882978729
C      -0.597883016     4.120062167     0.326436761
C       0.720201592     4.107708271    -0.092344708
C       2.361997196     2.303106541    -0.783146798
N       1.534599278     0.073501285    -1.539748632
C       2.510840558     1.002594305    -1.547349009
C       3.657409503     0.850358478    -2.330301058
C       3.779704271    -0.260904754    -3.156490797
C       2.743025985    -1.188322016    -3.186829431
C       1.647962106    -0.984881670    -2.354918626
O      -3.261626248    -3.128313671    -0.862696356
O       3.342542820    -3.043057476     0.706464543
N      -1.572318050    -0.039617331    -1.499985325
C      -1.744591415     1.069717783    -2.234312975
C      -2.878516025     1.304281243    -3.003539893
C      -3.892852116     0.352060987    -2.997240710
C      -3.708589575    -0.812247168    -2.261047447
C      -2.526811629    -0.991319989    -1.537869021
C      -2.315777488    -2.340719637    -0.882981110
C      -0.597425558    -4.120450990    -0.326436509
C       0.720656870    -4.107951338     0.092347064
C       2.362243369    -2.303170720     0.783177754
N       1.534596812    -0.073651354     1.539761687
C       2.510939778    -1.002637338     1.547372896
C       3.657488223    -0.850270508     2.330329613
C       3.779657688     0.261012518     3.156511329
C       2.742878789     1.188317799     3.186836591
C       1.647840988     0.984751227     2.354922399
H      -0.943513141    -1.795282374     2.185500092
H      -2.959091611    -2.219160213     3.578783813
H      -4.803286930    -0.506024869     3.565621732
H      -4.451272504     1.597466292     2.245191260
H      -1.219984483     4.971550544     0.560713355
H       1.375975303     4.947422397    -0.270814829
H       4.421423078     1.614520387    -2.288297496
H       4.661222979    -0.392176056    -3.773913025
H       2.777767913    -2.060051851    -3.828765587
H       0.831201734    -1.693220871    -2.321051512
H      -0.943711334     1.794855815    -2.185503796
H      -2.959344854     2.218515739    -3.578774754
H      -4.803352087     0.505177992    -3.565605163
H      -4.451099024    -1.598277732    -2.245181592
H      -1.219431514    -4.972007960    -0.560717398
H       1.376523134    -4.947593052     0.270817521
H       4.421585615    -1.614349167     2.288335840
H       4.661159351     0.392385301     3.773936261
H       2.777523566     2.060057714     3.828764248
H       0.831004447     1.693002289     2.321042976
N       0.016911043    -1.944115083    -0.041274304
N       0.016696116     1.943793978     0.041280108
C      -1.001147894    -2.764966307    -0.423205742
C       1.067820561    -2.747052082     0.285211810
C       1.067519724     2.746846761    -0.285197297
C      -1.001455696     2.764532922     0.423205410
63
Complex 6', Quintet
Fe      0.067867801    -0.000154096     0.000002775
O      -2.988066085     3.501992940     0.972424039
O       3.514846596     2.989256511    -0.838425046
N      -1.624895685     0.239629591     1.457753619
C      -1.982417681    -0.912460038     2.043974691
C      -3.265913816    -1.159521378     2.519075084
C      -4.229020072    -0.166192944     2.372518387
C      -3.854530034     1.046065594     1.804583902
C      -2.538825581     1.226456595     1.370760447
C      -2.144496108     2.609858234     0.894513136
C      -0.252879739     4.245030820     0.505254540
C       1.047426045     4.153386842     0.035431480
C       2.494009833     2.305171914    -0.904003538
N       1.596418902     0.084710847    -1.605055566
C       2.557484078     1.022245200    -1.707429131
C       3.629574570     0.877365889    -2.592124923
C       3.697579969    -0.246445685    -3.407273342
C       2.686171519    -1.197979384    -3.318390812
C       1.662042051    -0.992758187    -2.400924721
O      -2.987680658    -3.502641383    -0.972399237
O       3.515182560    -2.989171583     0.838422564
N      -1.624873020    -0.240126869    -1.457741056
C      -1.982521294     0.911920854    -2.043967409
C      -3.266041211     1.158834590    -2.519080238
C      -4.229035359     0.165396480    -2.372530596
C      -3.854412372    -1.046817549    -1.804588828
C      -2.538691334    -1.227057640    -1.370752816
C      -2.144208855    -2.610413145    -0.894497562
C      -0.252408074    -4.245374230    -0.505244990
C       1.047889165    -4.153584384    -0.035425850
C       2.494266495    -2.305206004     0.904007517
N       1.596425332    -0.084847215     1.605065557
C       2.557593316    -1.022276263     1.707440593
C       3.629662556    -0.877282782     2.592143365
C       3.697539551     0.246533292     3.407296324
C       2.686027752     1.197956857     3.318410730
C       1.661925982     0.992626781     2.400937971
H      -1.208789612    -1.666728392     2.104991077
H      -3.496791065    -2.112763420     2.978800922
H      -5.247739142    -0.325087960     2.707545018
H      -4.553428926     1.864759912     1.702116329
H      -0.778673731     5.121195975     0.855726383
H       1.778409702     4.941386946    -0.071697652
H       4.384084160     1.651237121    -2.628116054
H       4.519673971    -0.372012488    -4.102900093
H       2.684186575    -2.085707696    -3.939066575
H       0.862708474    -1.713437753    -2.284626308
H      -1.208978576     1.666277141    -2.104978721
H      -3.497022934     2.112048740    -2.978811040
H      -5.247769247     0.324174230    -2.707567704
H      -4.553219038    -1.865590991    -1.702125288
H      -0.778105564    -5.121597948    -0.855715175
H       1.778961062    -4.941502852     0.071701715
H       4.384256920    -1.651071308     2.628136305
H       4.519615259     0.372187757     4.102928832
H       2.683942932     2.085682681     3.939089689
H       0.862514293     1.713219229     2.284636912
N       0.129009902    -2.068818672     0.054679566
N       0.128780600     2.068517728    -0.054671082
C      -0.787976757    -2.937068314    -0.459289069
C       1.250202433    -2.800518168     0.322763811
C       1.249890356     2.800343253    -0.322758332
C      -0.788302026     2.936664811     0.459300345
63
Complex 7', Singlet
Fe     -0.000005280     0.000000244     0.000037101
O      -3.384633458    -2.888232301    -0.462796773
O       3.384579281    -2.888099001     0.463220244
N      -1.437699538    -0.039030040    -1.425985682
C      -1.485896850     0.974421064    -2.307907729
C      -2.545488674     1.172835000    -3.184655137
C      -3.615850280     0.289200613    -3.150281606
C      -3.557652064    -0.789128712    -2.273208759
C      -2.452374409    -0.940343412    -1.440197726
C      -2.385986254    -2.219705557    -0.647574386
C      -0.694799821    -4.092718908    -0.147705936
C       0.694721889    -4.092701800     0.148449519
C       2.385910815    -2.219631890     0.648100414
N       1.437705259    -0.038753180     1.426053300
C       2.452349733    -0.940098673     1.440445698
C       3.557648063    -0.788738417     2.273402713
C       3.615893238     0.289772616     3.150248580
C       2.545564531     1.173453555     3.184444900
C       1.485956467     0.974893386     2.307750214
O      -3.384607227     2.888168228     0.462416936
O       3.384627595     2.888166561    -0.463433632
N      -1.437743571     0.039076755     1.426017380
C      -1.486000632    -0.974371956     2.307939866
C      -2.545639373    -1.172769800     3.184633219
C      -3.615984881    -0.289119156     3.150204552
C      -3.557719036     0.789215820     2.273143946
C      -2.452393369     0.940420725     1.440194217
C      -2.385918520     2.219825796     0.647639538
C      -0.694698955     4.092746330     0.147553830
C       0.694830408     4.092675622    -0.148565504
C       2.386010829     2.219513661    -0.647918314
N       1.437733998     0.038706964    -1.425949910
C       2.452405085     0.940021032    -1.440325178
C       3.557699780     0.788648664    -2.273284215
C       3.615923253    -0.289857997    -3.150137638
C       2.545579248    -1.173521359    -3.184334853
C       1.485971411    -0.974942796    -2.307642976
H      -0.645400817     1.652370597    -2.305113260
H      -2.519077402     2.012706451    -3.866699703
H      -4.469318251     0.420048813    -3.804273371
H      -4.343205871    -1.531346378    -2.234599350
H      -1.337039122    -4.946865211    -0.293680495
H       1.336961904    -4.946831460     0.294518753
H       4.343175899    -1.530990966     2.234940452
H       4.469372555     0.420728613     3.804203626
H       2.519194112     2.013470704     3.866310704
H       0.645489687     1.652875167     2.304819535
H      -0.645516548    -1.652335285     2.305193076
H      -2.519277209    -2.012643357     3.866677123
H      -4.469487852    -0.419953232     3.804153460
H      -4.343249634     1.531456314     2.234510586
H      -1.336922538     4.946918499     0.293445260
H       1.337093770     4.946779304    -0.294684873
H       4.343249216     1.530877955    -2.234805247
H       4.469402565    -0.420830094    -3.804089482
H       2.519195054    -2.013537360    -3.866201540
H       0.645492370    -1.652910543    -2.304708895
O      -0.000035293    -1.977412681     0.000237125
C       1.087031662    -2.790577362     0.251620337
C      -1.087112674    -2.790606541    -0.251013044
C       1.087122040     2.790533721    -0.251579611
C      -1.087034117     2.790651542     0.251002566
O       0.000021729     1.977413294    -0.000203346
63
Complex 7', Triplet
Fe      0.000008144    -0.024524655     0.000028384
O       3.379641740     3.037814304    -0.429513271
O      -3.380248019     3.036919285     0.429899450
N       1.485253429     0.149942436    -1.415929151
C       1.591046737    -0.882867358    -2.269645618
C       2.692916084    -1.082488676    -3.092277899
C       3.740100337    -0.173449770    -3.030916442
C       3.622162888     0.922732781    -2.181672109
C       2.481197077     1.072109055    -1.396790886
C       2.381783778     2.368743719    -0.621936485
C       0.694668950     4.257267853    -0.146790303
C      -0.695657432     4.257094679     0.146823051
C      -2.382192059     2.368167016     0.622414745
N      -1.485287339     0.149329616     1.415974194
C      -2.481280449     1.071450341     1.397178783
C      -3.622072065     0.921906491     2.182283176
C      -3.739789683    -0.174408669     3.031384716
C      -2.692580427    -1.083444587     3.092342692
C      -1.590893668    -0.883649488     2.269512610
O       3.377680668    -3.025074082     0.465912305
O      -3.377336872    -3.025292770    -0.466610660
N       1.458924217    -0.134228877     1.407674912
C       1.546748149     0.895451838     2.268383171
C       2.624891809     1.086298524     3.123112336
C       3.670420065     0.174171957     3.088145211
C       3.570889172    -0.918584169     2.232825278
C       2.451038839    -1.063034952     1.416852057
C       2.372533273    -2.363604784     0.644060210
C       0.694574741    -4.262417144     0.152901153
C      -0.694136598    -4.262444608    -0.153783707
C      -2.372251486    -2.363680112    -0.644577750
N      -1.458888317    -0.134008338    -1.407649131
C      -2.450868010    -1.062957644    -1.417104623
C      -3.570680999    -0.918486700    -2.233124988
C      -3.670313309     0.174445086    -3.088209601
C      -2.624923406     1.086740683    -3.122885753
C      -1.546815794     0.895864453    -2.268119498
H       0.761978339    -1.575696809    -2.285819872
H       2.715519142    -1.938939370    -3.753492981
H       4.624560069    -0.299141374    -3.643544039
H       4.393127068     1.678946300    -2.128069257
H       1.336936964     5.111705705    -0.291574843
H      -1.338189717     5.111372937     0.291377703
H      -4.393086147     1.678087863     2.128946908
H      -4.624110443    -0.300218045     3.644188259
H      -2.715015995    -1.940018733     3.753403085
H      -0.761824237    -1.576483251     2.285369828
H       0.721976897     1.592373575     2.263723168
H       2.631226706     1.940492013     3.787565945
H       4.538154744     0.294367827     3.725249825
H       4.339945431    -1.677784920     2.198432294
H       1.334905950    -5.117555103     0.302226607
H      -1.334400030    -5.117606788    -0.303262403
H      -4.339628279    -1.677808341    -2.198956804
H      -4.538022042     0.294655647    -3.725346564
H      -2.631339558     1.941091661    -3.787135681
H      -0.722166057     1.592930751    -2.263229594
O      -0.000168547     2.144027575     0.000290243
C      -1.081610273     2.949438064     0.247345682
C       1.081027533     2.949702023    -0.246945565
C      -1.080117904    -2.955976911    -0.258722209
C       1.080447570    -2.955937471     0.258087232
O       0.000136632    -2.150804742    -0.000250242
63
Complex 7', Quintet
Fe      0.028253196     0.000009476    -0.000013624
O      -3.398337545    -3.106646103    -0.532860970
O       3.348841568    -3.242395917     0.361453590
N      -1.534171496    -0.209322823    -1.484384128
C      -1.661111366     0.878164174    -2.260520185
C      -2.824600721     1.176214712    -2.962693879
C      -3.906850886     0.311601256    -2.854206386
C      -3.770529519    -0.838255973    -2.081314276
C      -2.568374021    -1.077178467    -1.419886174
C      -2.426445149    -2.395037545    -0.708060700
C      -0.737141142    -4.263880901    -0.277636468
C       0.649621058    -4.295992056     0.023637372
C       2.397467532    -2.511530086     0.566266292
N       1.548564857    -0.362675075     1.476492323
C       2.571982819    -1.237356704     1.347257809
C       3.786399871    -1.047389722     2.000632257
C       3.946804088     0.057340056     2.833071313
C       2.876242098     0.926017410     3.007244853
C       1.697993298     0.679323325     2.309626745
O      -3.398443957     3.106522736     0.532779635
O       3.348725636     3.242527036    -0.361547729
N      -1.534174777     0.209298342     1.484384657
C      -1.661063835    -0.878176901     2.260544903
C      -2.824540225    -1.176264073     2.962723492
C      -3.906832158    -0.311704840     2.854211821
C      -3.770559819     0.838146429     2.081302724
C      -2.568410836     1.077110965     1.419876987
C      -2.426521250     2.394975213     0.708054197
C      -0.737250121     4.263874482     0.277719171
C       0.649504491     4.296026622    -0.023580113
C       2.397364628     2.511650770    -0.566389278
N       1.548545457     0.362716334    -1.476515771
C       2.571931913     1.237440494    -1.347304530
C       3.786374614     1.047474565    -2.000630484
C       3.946847258    -0.057304326    -2.832990608
C       2.876327063    -0.926037725    -3.007131694
C       1.698045596    -0.679336242    -2.309570097
H      -0.797674003     1.529127601    -2.313392106
H      -2.868178051     2.070691911    -3.570544397
H      -4.835240496     0.515727918    -3.373713617
H      -4.569967052    -1.561241255    -1.993631406
H      -1.395144689    -5.101658815    -0.446068659
H       1.277793568    -5.163920160     0.147577184
H       4.576120261    -1.772839053     1.860473566
H       4.885547236     0.223191288     3.347580142
H       2.940072559     1.784653268     3.663076922
H       0.842322261     1.334782752     2.410951803
H      -0.797594976    -1.529095443     2.313438758
H      -2.868077079    -2.070728462     3.570595833
H      -4.835212180    -0.515863293     3.373723782
H      -4.570026855     1.561097705     1.993608123
H      -1.395264511     5.101632357     0.446209423
H       1.277660189     5.163970929    -0.147489451
H       4.576065592     1.772959796    -1.860491230
H       4.885616283    -0.223159779    -3.347450944
H       2.940215161    -1.784723400    -3.662893091
H       0.842411126    -1.334851725    -2.410851439
O      -0.007133971     2.160247306     0.070743786
O      -0.007065118    -2.160231357    -0.070765527
C      -1.106786498     2.953141505     0.347863662
C       1.063683094     3.004527417    -0.165340105
C       1.063783330    -3.004478066     0.165301787
C      -1.106699983    -2.953157021    -0.347849871
25
Hexaamineiron(II), Symmetrized Singlet
Fe     -1.682444129    -0.561233218    -0.000433600
N      -1.720873857     1.502407909    -0.002540540
H      -2.375688466     1.877905600     0.680483641
H      -0.821405828     1.925671548     0.216769681
H      -2.004233308     1.902588129    -0.894387911
N       0.380810120    -0.522769870     0.039547120
H       0.765019472    -0.278975868     0.950169719
H       0.810741653    -1.409634995    -0.214497592
H       0.765152539     0.157939628    -0.612537012
N      -3.745698376    -0.599696559    -0.040414320
H      -4.130894139    -1.512276043    -0.275113681
H      -4.175661303    -0.336139110     0.843669806
H      -4.129110092     0.045955428    -0.727751691
N      -1.644014397    -2.624874346     0.001673340
H      -2.379825568    -3.024890960     0.580244894
H      -1.766076893    -3.035395064    -0.921627403
H      -0.776394486    -3.013457928     0.365252209
N      -1.722457160    -0.559871439     2.063178061
H      -0.992577182    -1.145177749     2.464300904
H      -1.591285148     0.362714293     2.472517740
H      -2.593860106    -0.914227871     2.451806575
N      -1.642431098    -0.562594987    -2.064045271
H      -0.982487090    -1.241716685    -2.437697335
H      -2.540027983    -0.789417992    -2.487383185
H      -1.365292745     0.330380046    -2.466081363
25
Hexaamineiron(II), Symmetrized Triplet
Fe     -1.682444262    -0.561233261    -0.000433600
N      -1.723350321     1.635384908    -0.002676310
H      -2.428558047     1.997084139     0.634675749
H      -0.844173932     2.062033625     0.277633999
H      -1.947864579     2.020681093    -0.916204856
N       0.362816660    -0.523105350     0.039198450
H       0.741082427    -0.526874647     0.983956700
H       0.785783719    -1.319601457    -0.432535640
H       0.751951542     0.301292024    -0.413026711
N      -3.727705176    -0.599361161    -0.040065650
H      -4.098284895    -1.433073053    -0.491646286
H      -4.150065223    -0.577493760     0.885325027
H      -4.127421688     0.190188869    -0.543358671
N      -1.641538197    -2.757851440     0.001809110
H      -2.342433129    -3.151690662     0.624451331
H      -1.832909985    -3.143725349    -0.919224568
H      -0.750682580    -3.149271618     0.295706490
N      -1.725035650    -0.559783728     2.196153207
H      -1.242840784    -1.368949735     2.579597388
H      -1.258173784     0.257583245     2.581208998
H      -2.655490947    -0.569214952     2.604143485
N      -1.639852868    -0.562682778    -2.197020407
H      -0.997301104    -1.255574550    -2.571826770
H      -2.544142002    -0.754446427    -2.619745645
H      -1.333941837     0.330498454    -2.573609986
25
Hexaamineiron(II), Symmetrized Quintet
Fe     -1.682444262    -0.561233261    -0.000433600
N      -1.723964749     1.668379007    -0.002709990
H      -2.351469306     2.027158079     0.712233877
H      -0.808789296     2.063087487     0.195370678
H      -2.032356161     2.079773952    -0.879321236
N       0.546750019    -0.519676450     0.042762620
H       0.901291520    -0.206580008     0.942197204
H       0.981960357    -1.418900814    -0.143783798
H       0.919421338     0.122552130    -0.651733713
N      -3.911638527    -0.602790060    -0.043629820
H      -4.271110075    -1.530862271    -0.248438699
H      -4.348374684    -0.308418332     0.825555175
H      -4.279615223     0.012148595    -0.764697246
N      -1.640923769    -2.790845528     0.001842790
H      -2.388580651    -3.172865937     0.575165618
H      -1.769525065    -3.175813009    -0.929722386
H      -0.778848508    -3.190014665     0.363174945
N      -1.725675399    -0.559761968     2.229146829
H      -1.017018363    -1.179756643     2.612824288
H      -1.537859771     0.362022959     2.613232516
H      -2.610003673    -0.864389829     2.626790248
N      -1.639213119    -0.562704548    -2.230014029
H      -1.010382143    -1.278302087    -2.585268517
H      -2.552708540    -0.762221702    -2.627976012
H      -1.329580829     0.312913332    -2.642751841
